# Supplementary material
Source: publisher figshare collection journal article supplement (https://acs.figshare.com/ndownloader/files/3823321)

## *Supporting Information*

# **Aza-Wacker-Type Reaction between Electron-Deficient Olefins and *N*-Alkylsulfonamides**

Huayou Hu,<sup>\*,†</sup> Jiaxin Tian,<sup>†</sup> Yun Liu,<sup>§</sup> Yong Liu,<sup>†</sup> Fei Shi,<sup>†</sup> Xiang Wang,<sup>†</sup> Yuhe Kan,<sup>†</sup>  
and Chao Wang<sup>\*,‡</sup>

<sup>†</sup> Jiangsu Key Laboratory for Chemistry of Low-Dimensional Materials, School of Chemistry and  
Chemical Engineering, Huaiyin Normal University, Huaian 223300, P. R. China

<sup>‡</sup> School of Material Science and Engineering, Southwest University of Science and Technology,  
Mianyang 621010, P. R. China

<sup>§</sup> Jiangsu Key Laboratory of Green Synthetic Chemistry for Functional Materials, School of Chemistry  
and Chemical Engineering, Jiangsu Normal University, Xuzhou 221116, P. R. China

## **Table of Contents**

|                                                                    |          |
|--------------------------------------------------------------------|----------|
| <b>Interaction between palladium and 1i</b>                        | <b>1</b> |
| <b>Interaction between palladium acetate and MeSO<sub>3</sub>H</b> | <b>4</b> |
| <b>Interaction between palladium acetate and 2a</b>                | <b>7</b> |
| <b>Copies of Compounds' NMR spectra and ORTEPs</b>                 | <b>9</b> |

**Procedure and  $^1\text{H}$  NMR spectra for reveal the interaction between palladium with **1i**:**

*N*,4-dimethylbenzenesulfonamide (19 mg, 0.10 mmol) was added to 0.60 mL  $\text{CDCl}_3$  in a NMR tube:

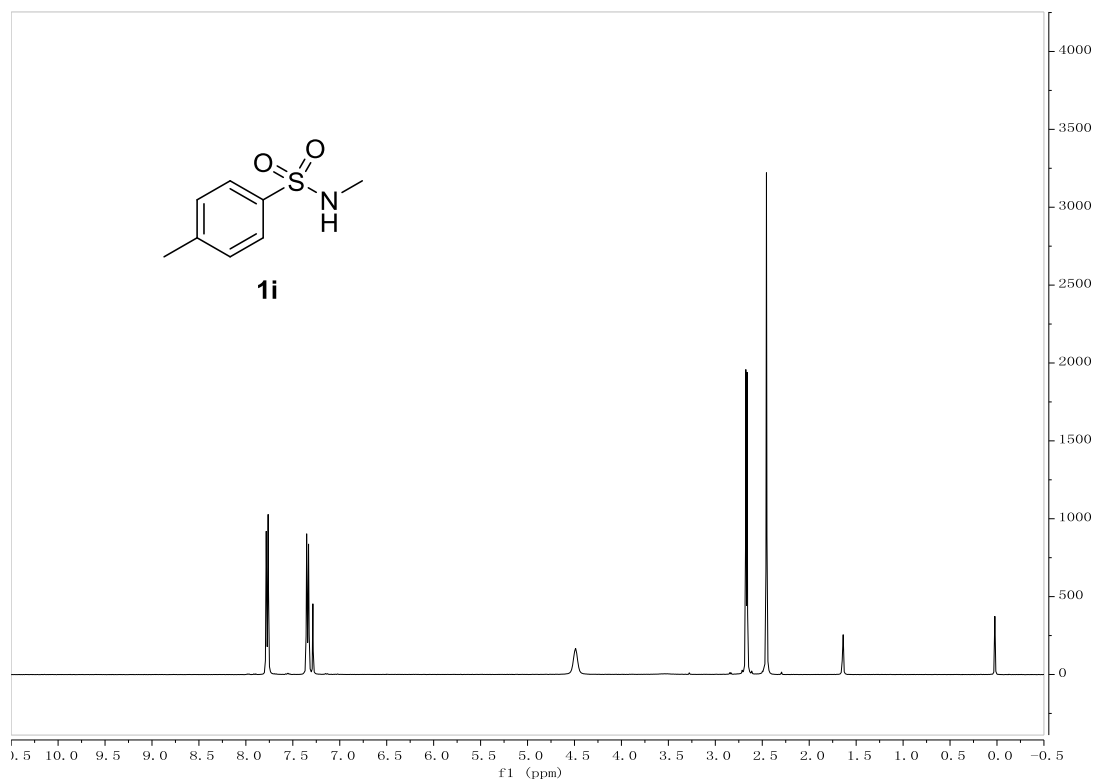

Then palladium acetate (22.4 mg, 0.10 mmol) was added to the NMR tube:

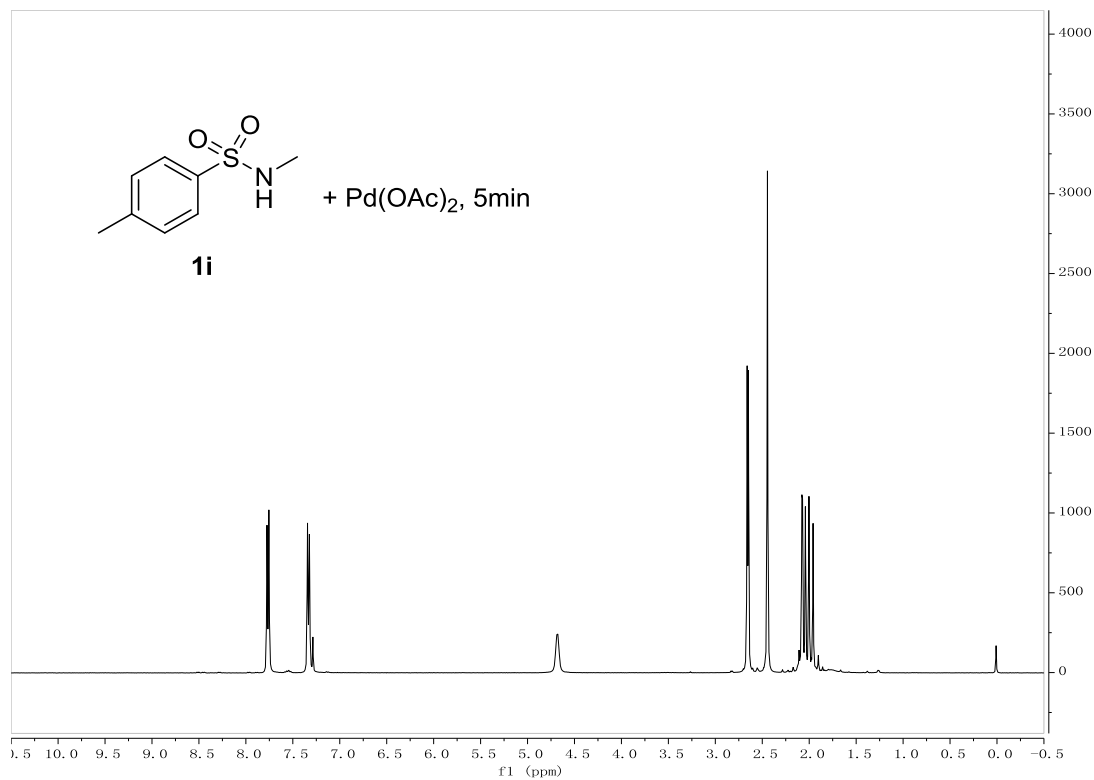

After 2h at room temperature:

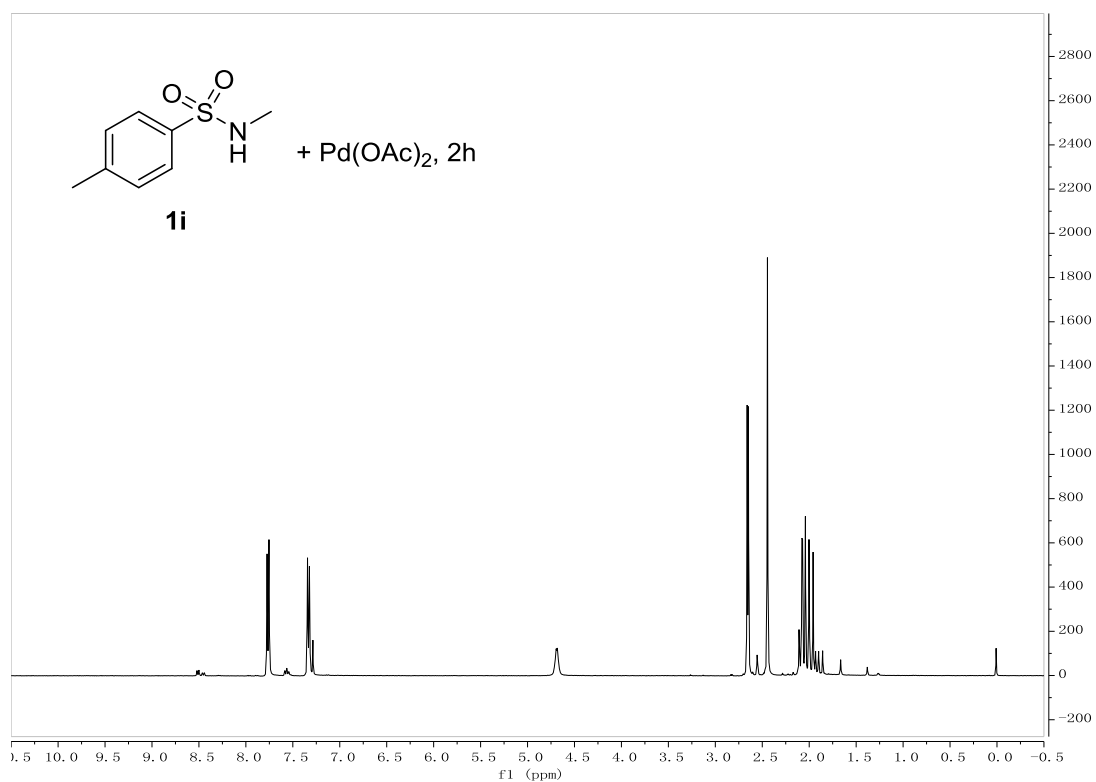

After 22h at room temperature:

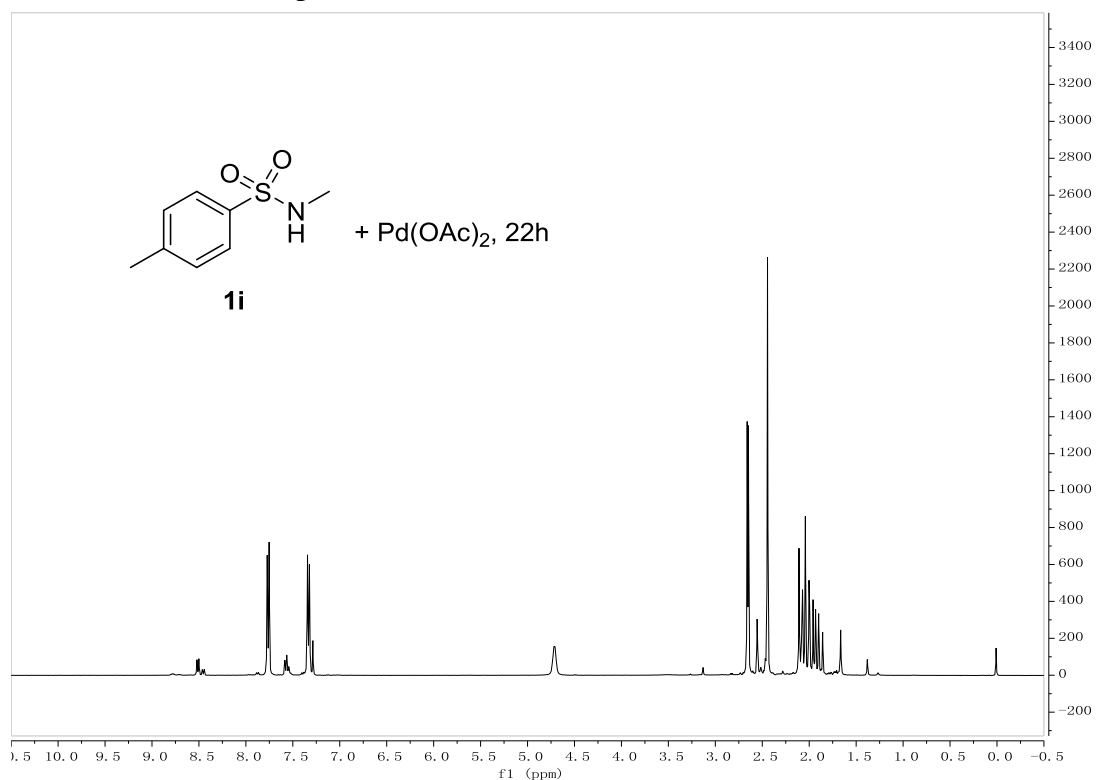

Then methanesulfonic acid (13  $\mu$ L, 0.20 mmol) was added to the NMR tube, after 10min:

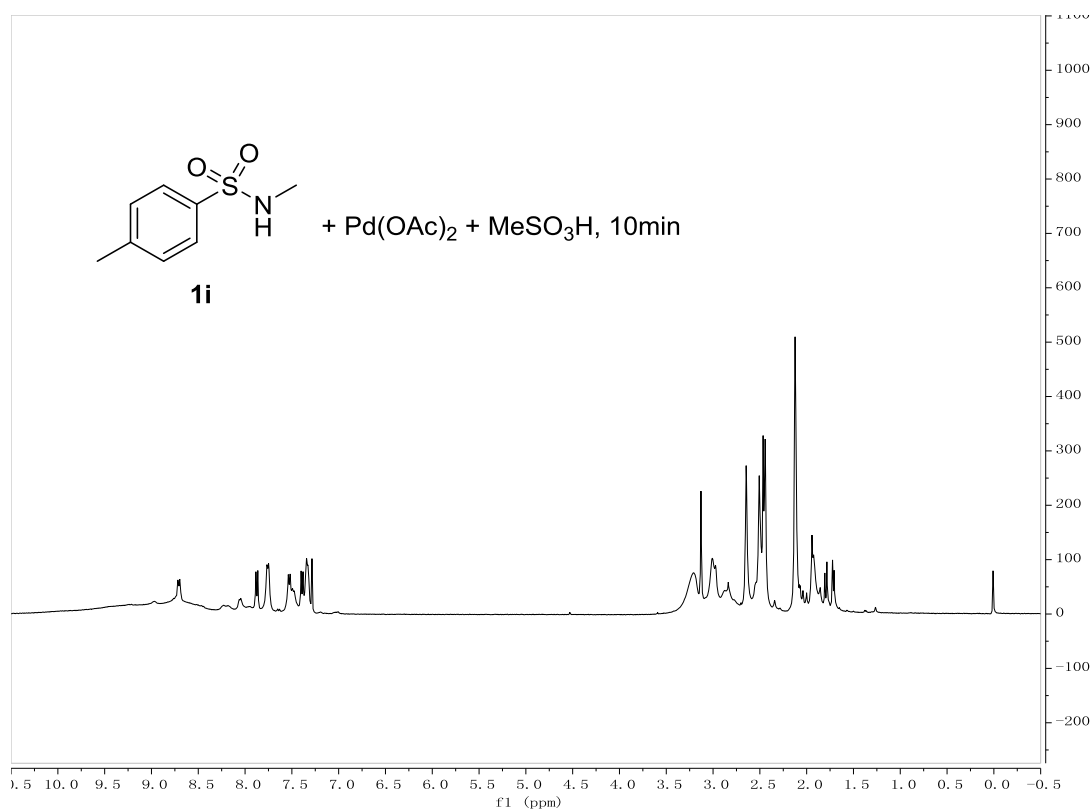

After 1h at room temperature:

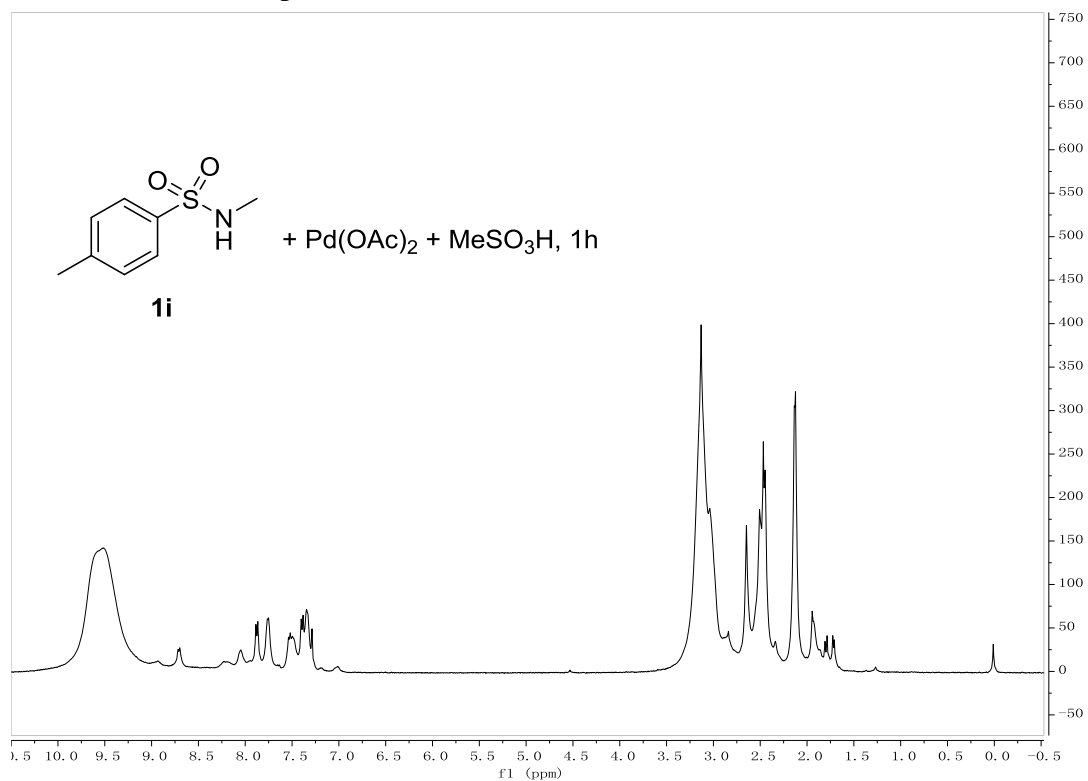

After 18h at room temperature:

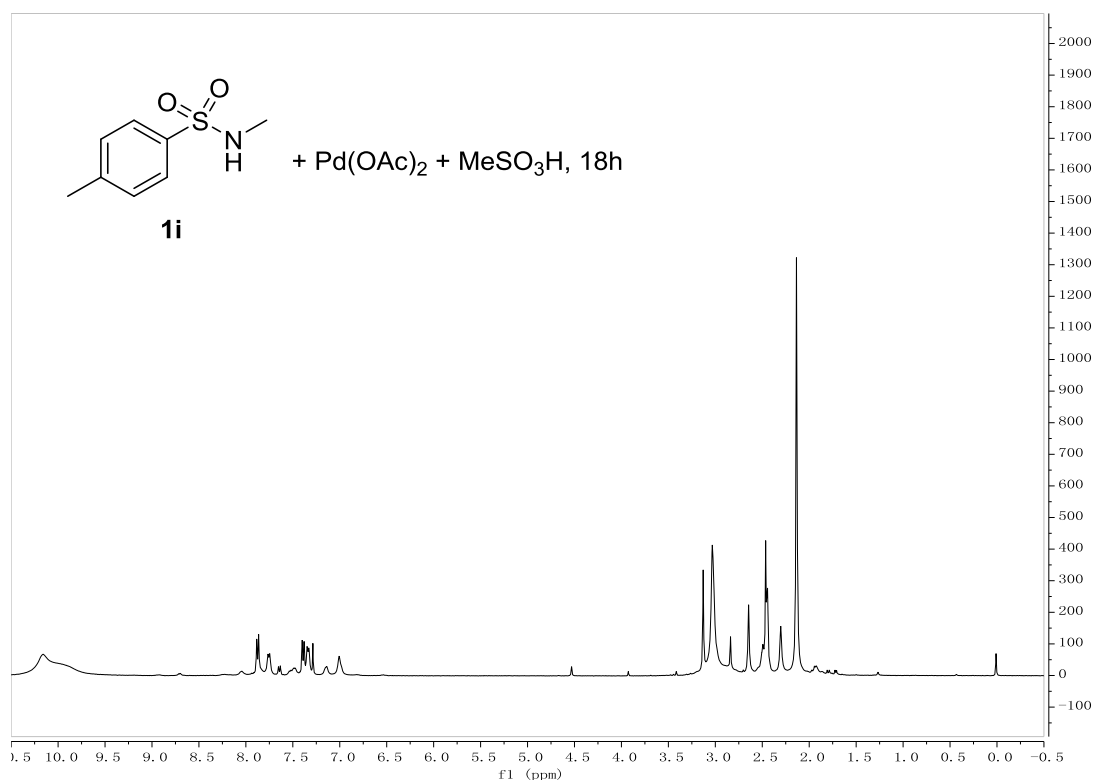

The  $^1\text{H}$  NMR spectra of **1i** (0.10 mmol) with  $\text{MeSO}_3\text{H}$  (0.20 mmol) in 0.60 mL  $\text{CDCl}_3$ :

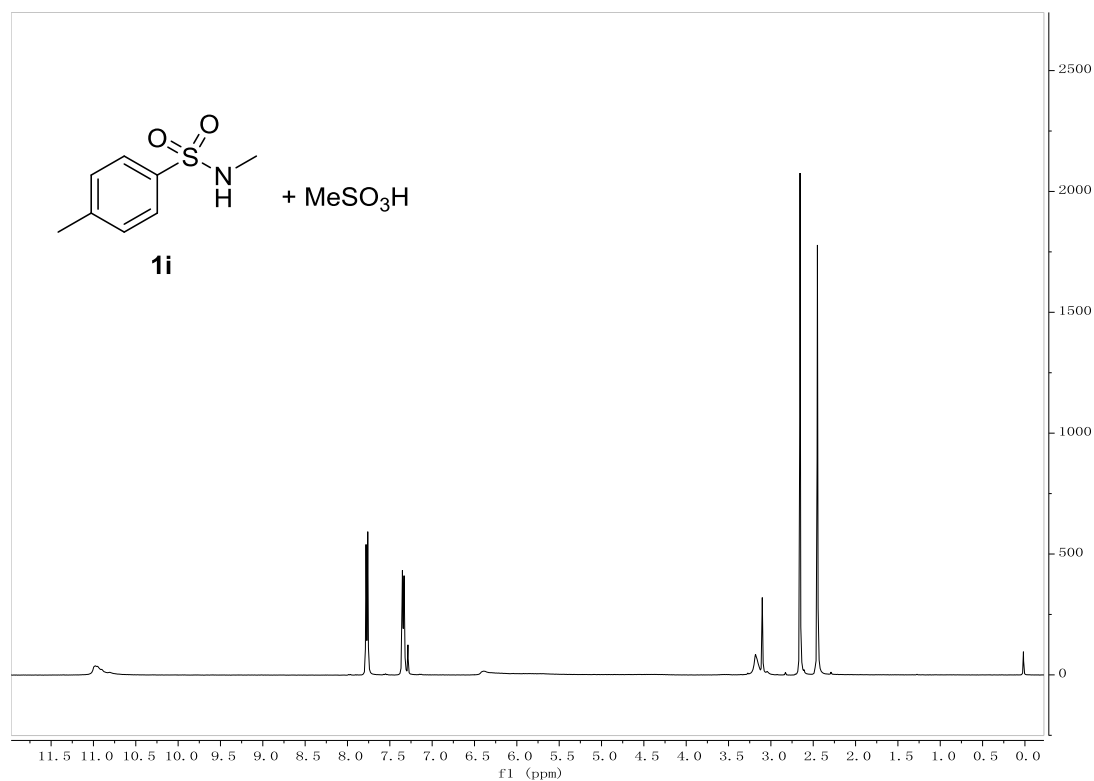

**Procedure and  $^1\text{H}$  NMR spectra for reveal the interaction between palladium acetate and  $\text{MeSO}_3\text{H}$ :**

Palladium acetate (11.2 mg, 0.050 mmol) was added to 0.60 mL  $\text{CDCl}_3$  in a NMR tube:

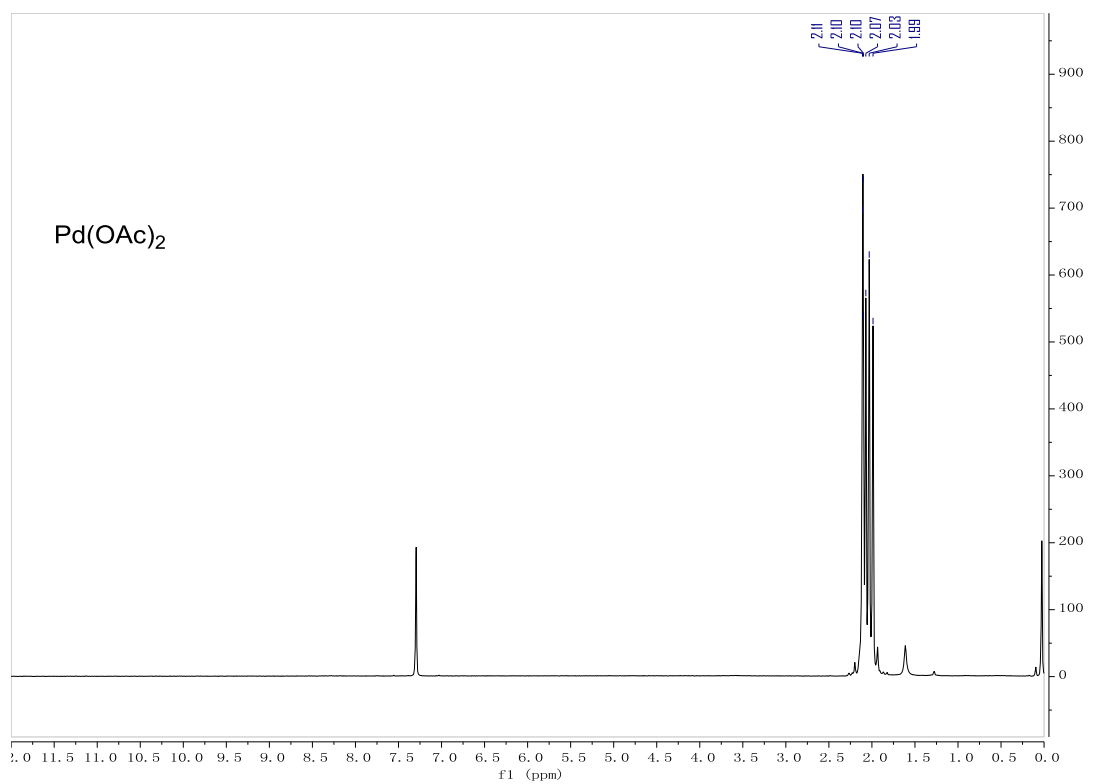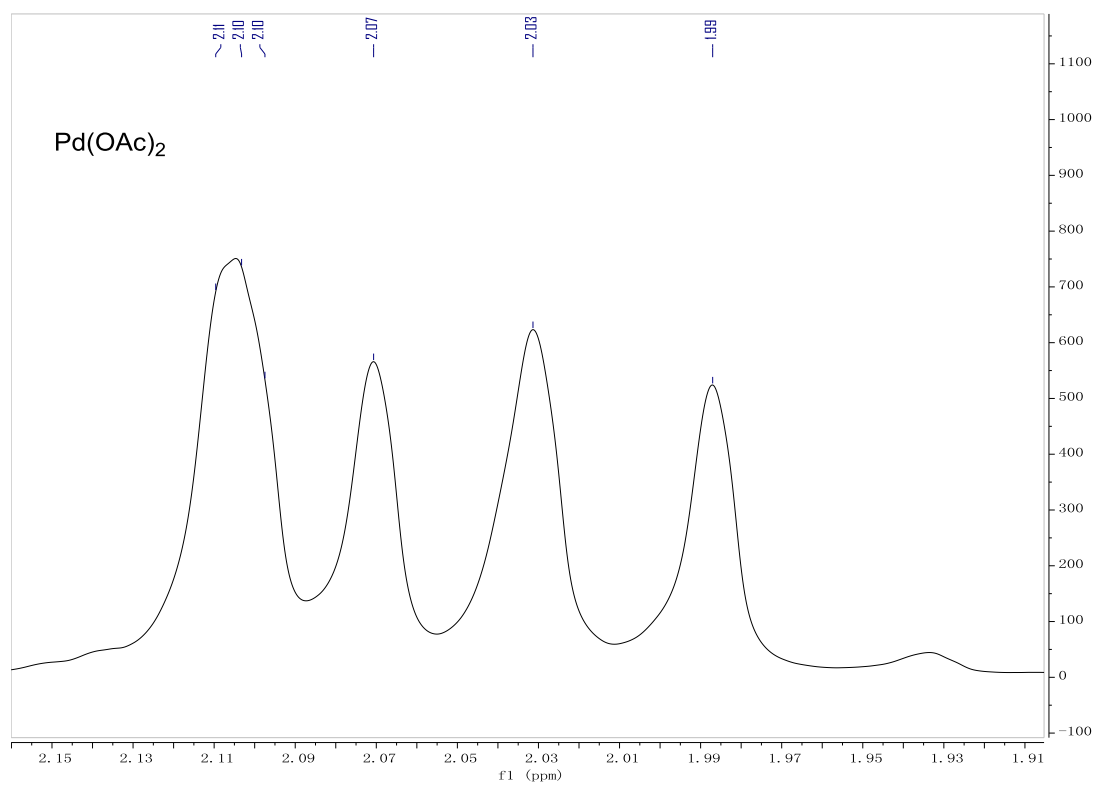

Then 0.10 mmol  $\text{MeSO}_3\text{H}$  was added, after 5mins:

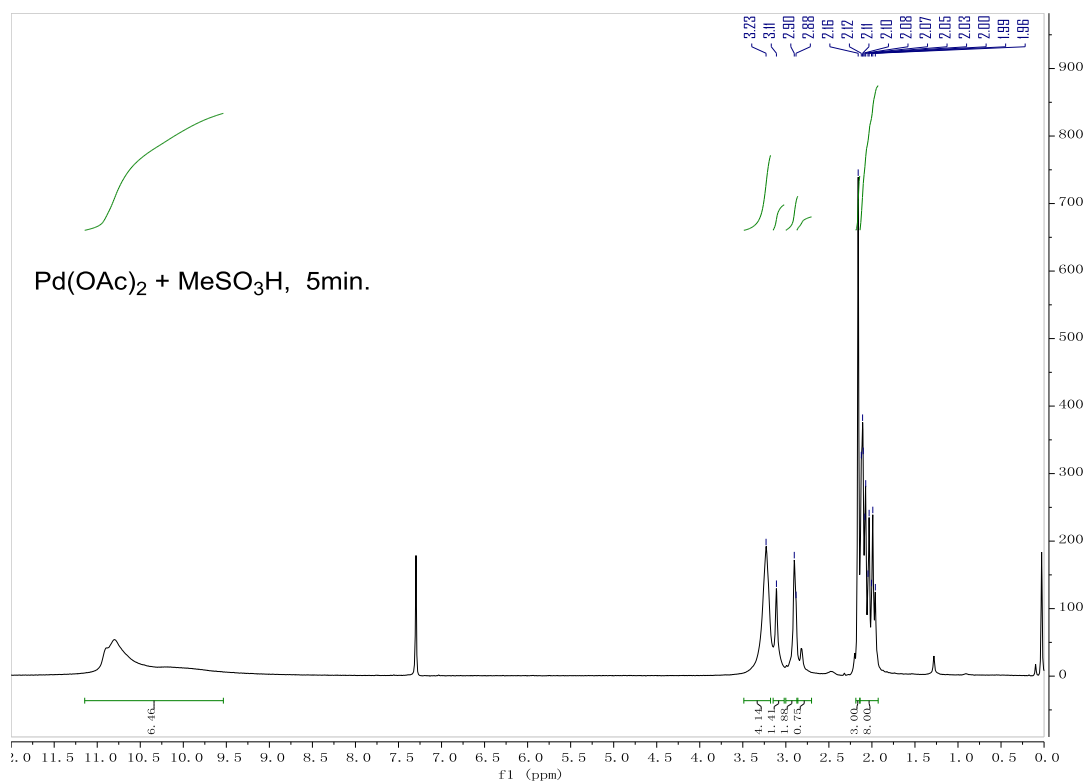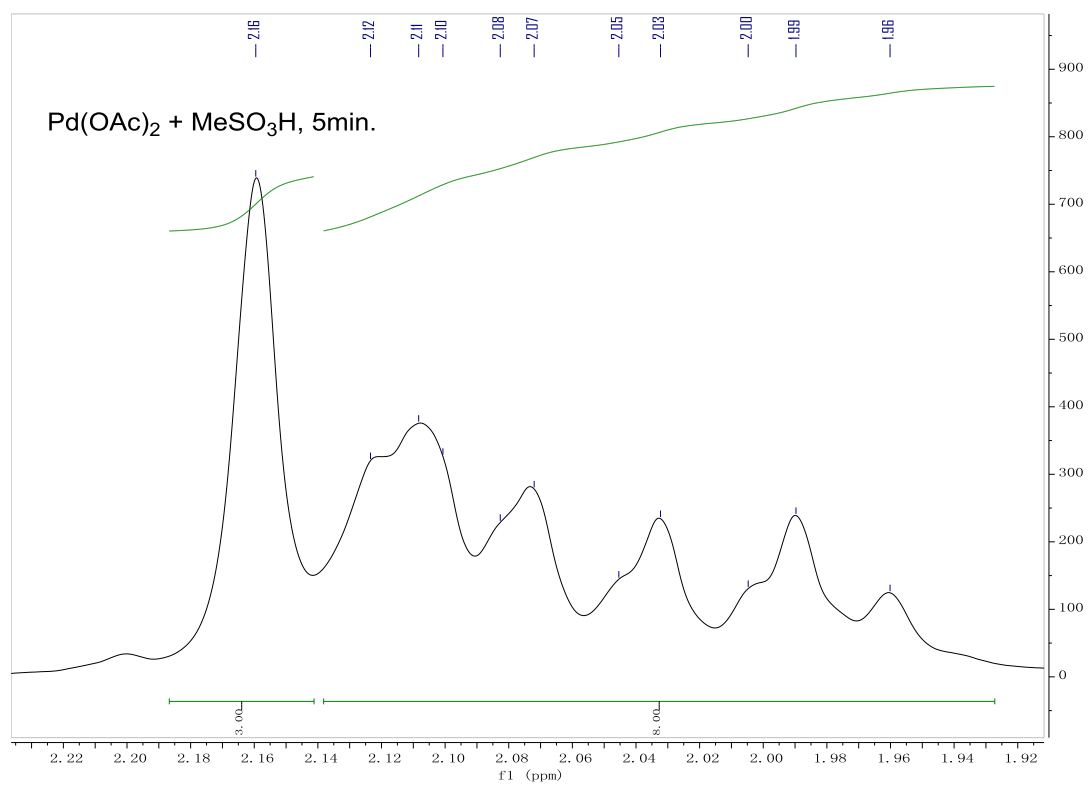

After 24h (yellow solid was precipitated):

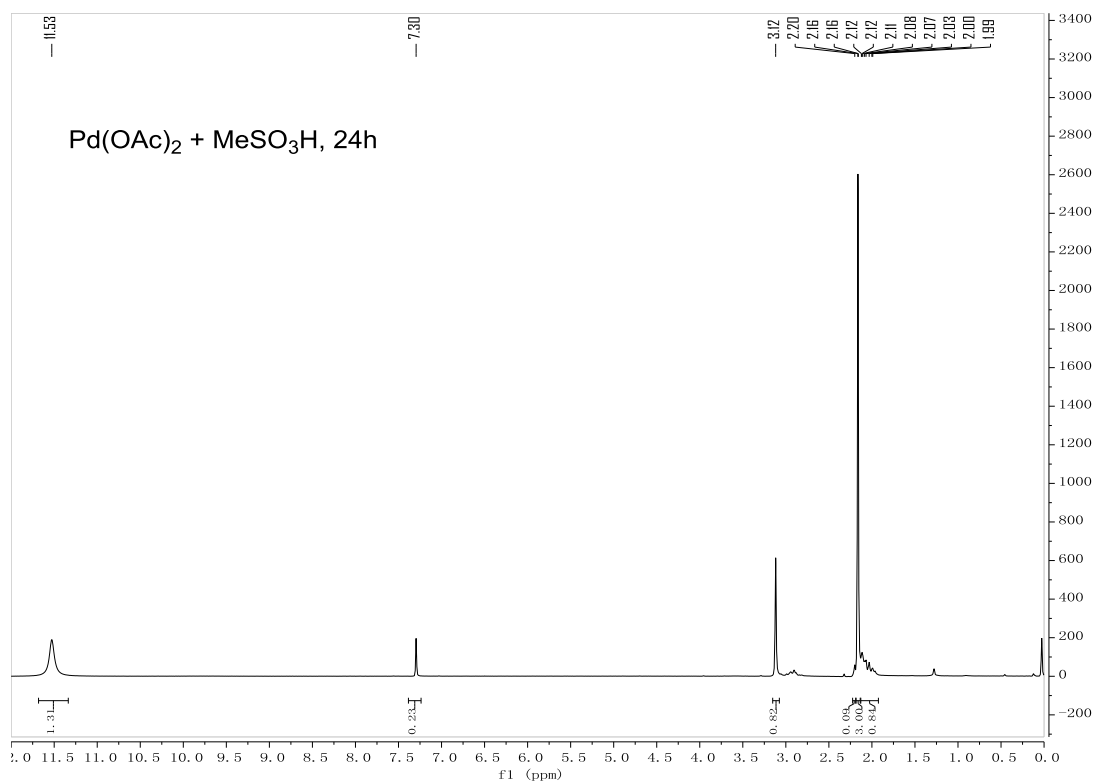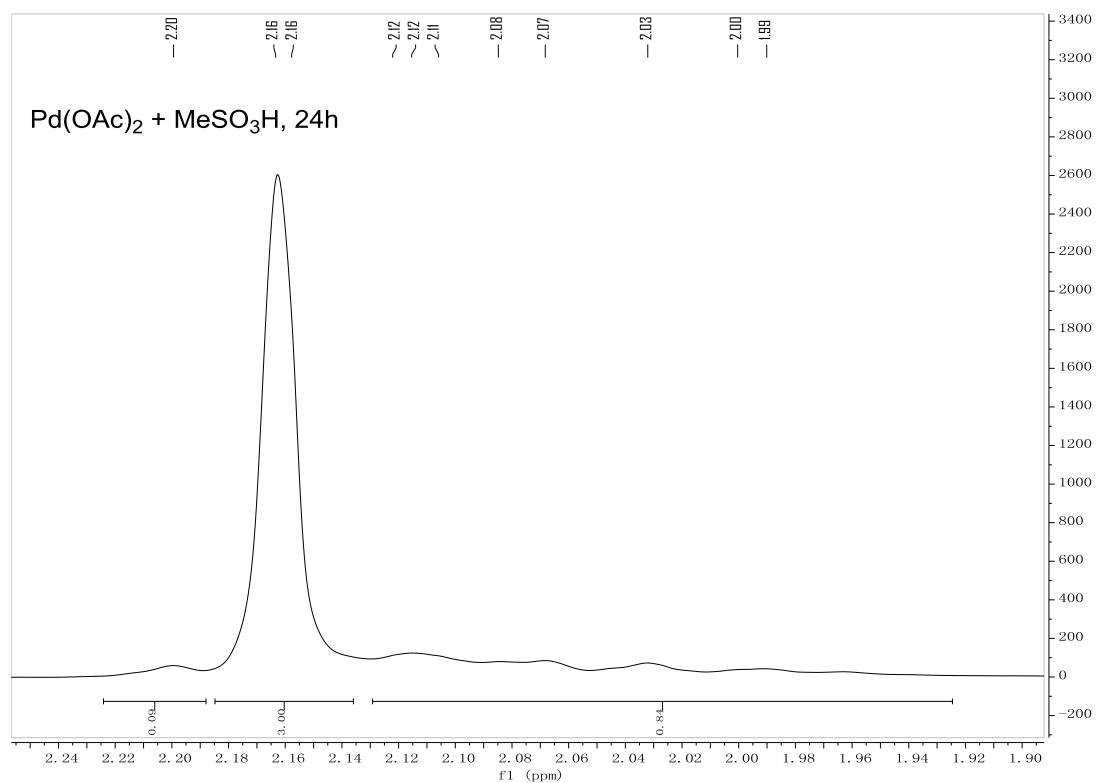

**Procedure and  $^1\text{H}$  NMR spectra for reveal the interaction between palladium acetate and methyl acrylate (2a):**

Methyl acrylate (0.10 mmol) was added to 0.60 mL  $\text{CDCl}_3$  in a NMR tube:



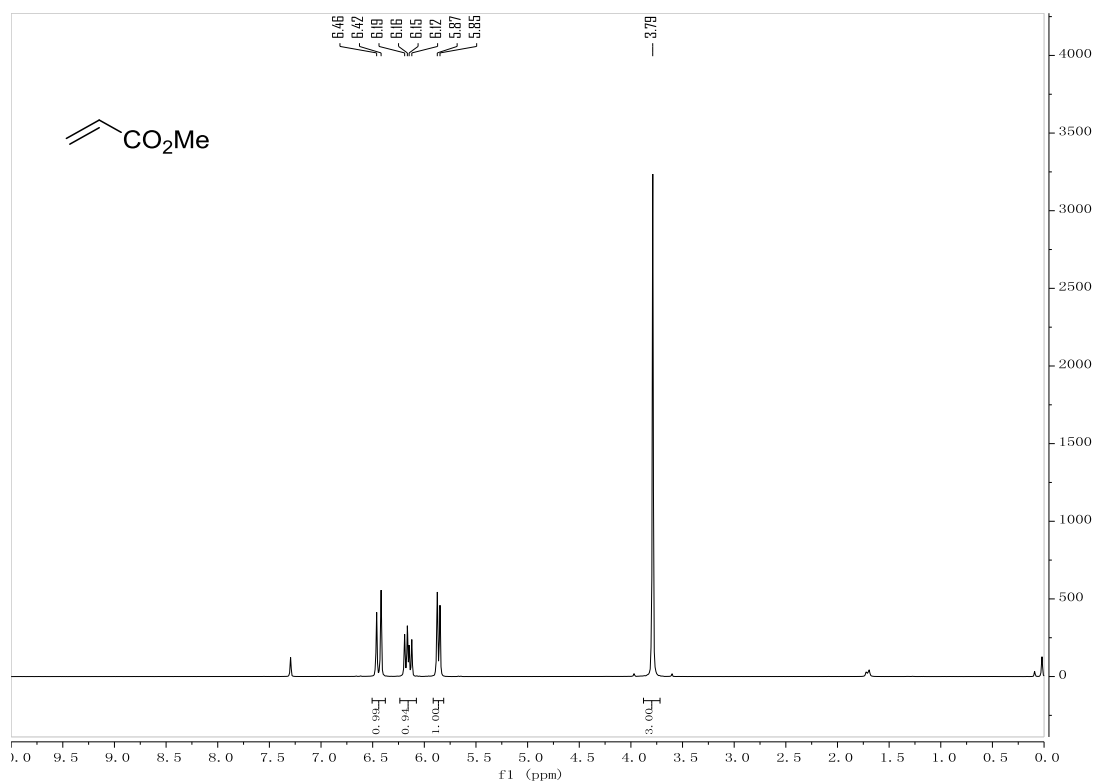

Then palladium acetate (0.050 mmol) was added, after 5min:

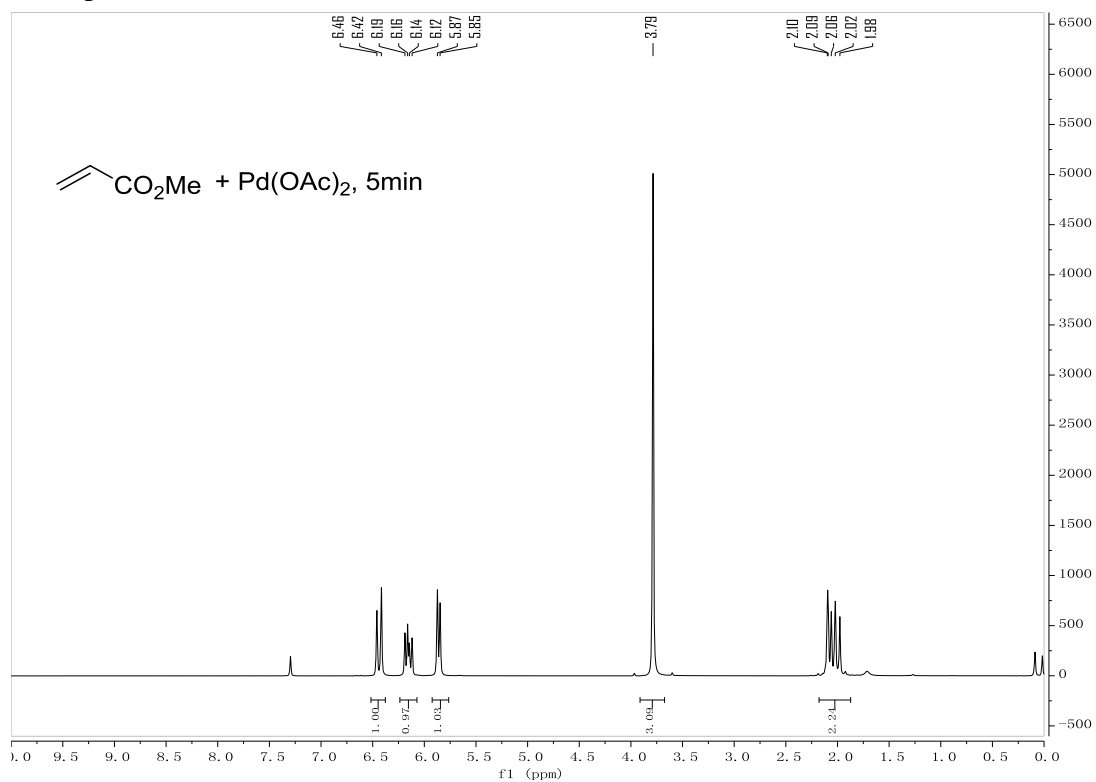

After 24h:

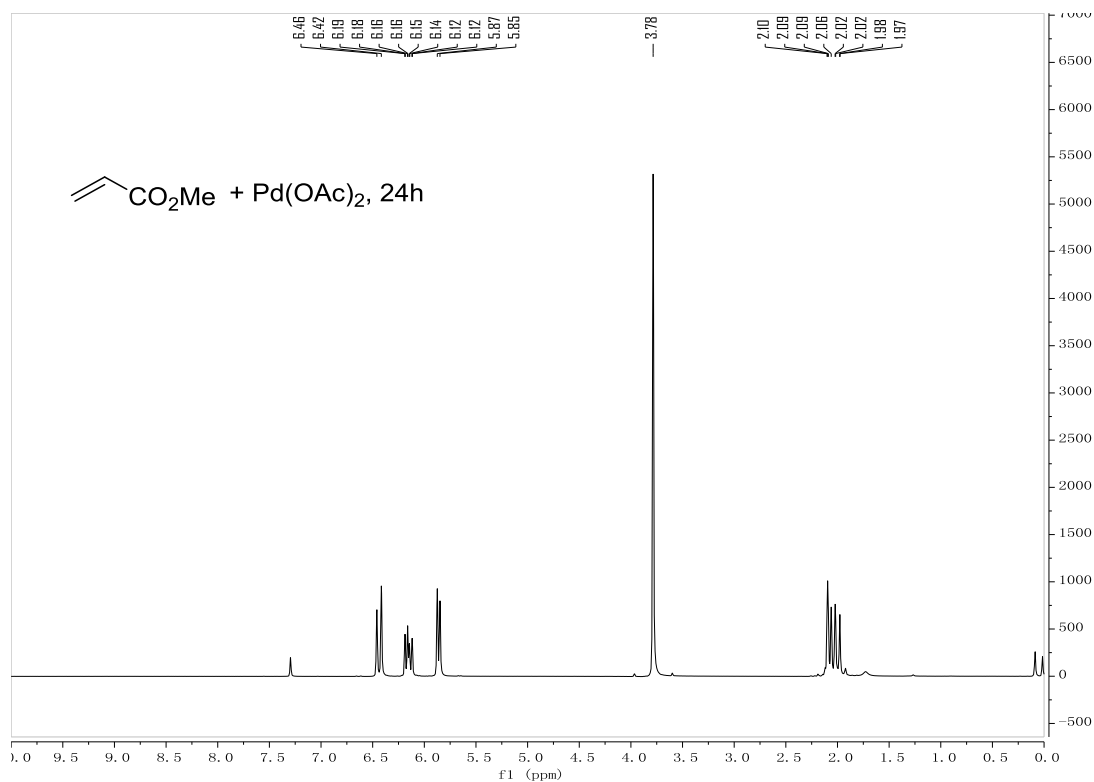

**Copies of Compounds' NMR spectra and ORTEP:**

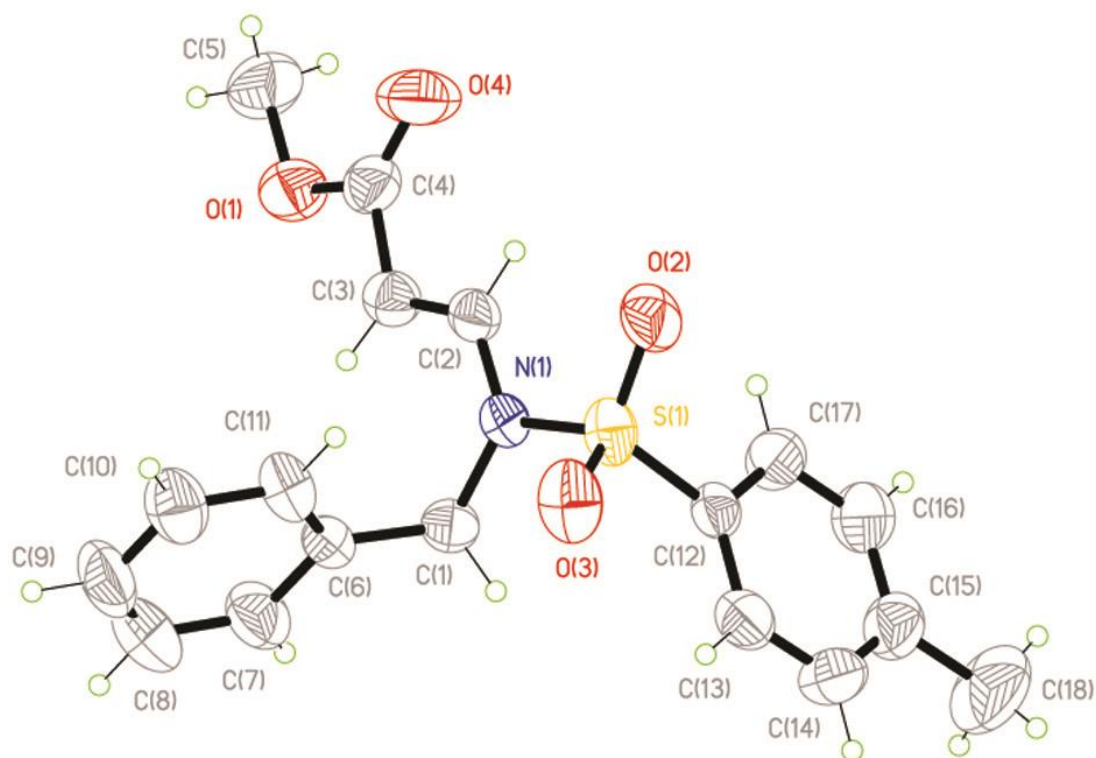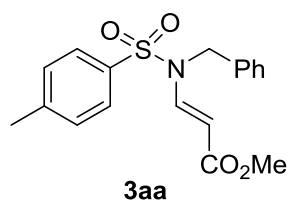

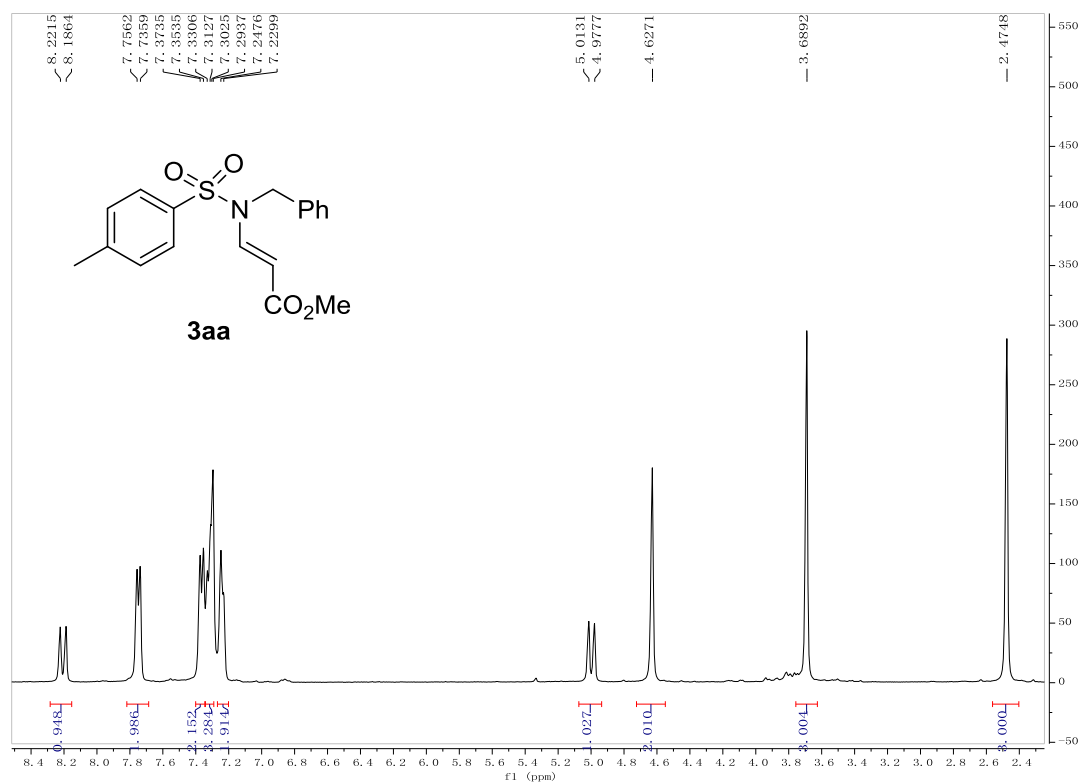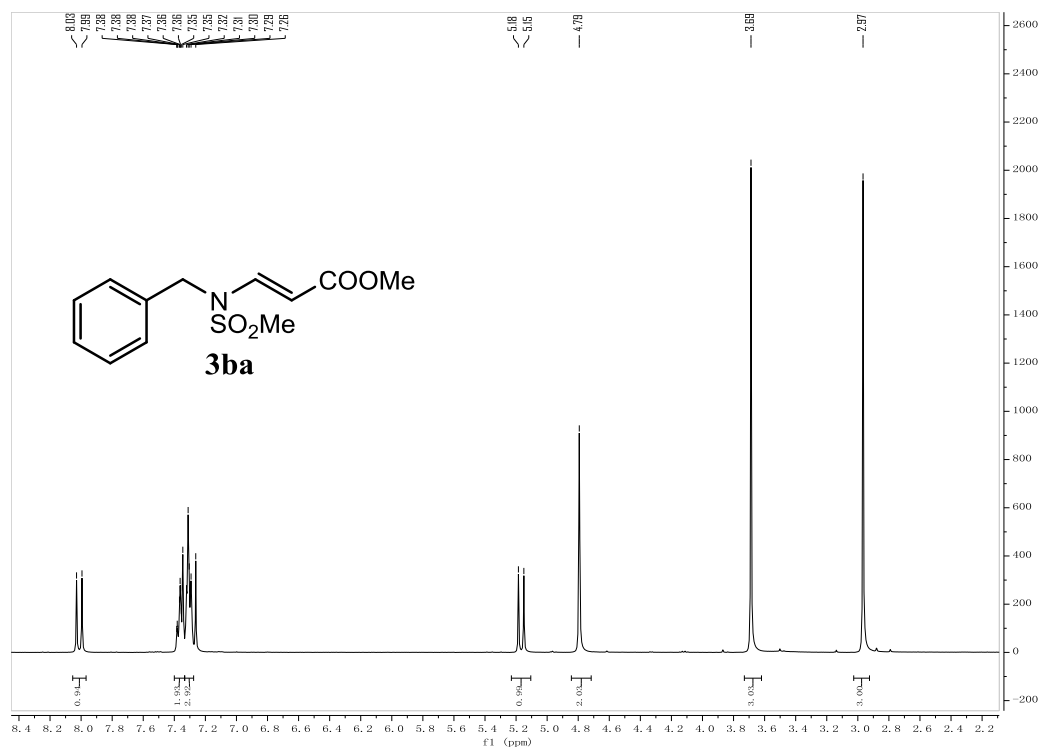

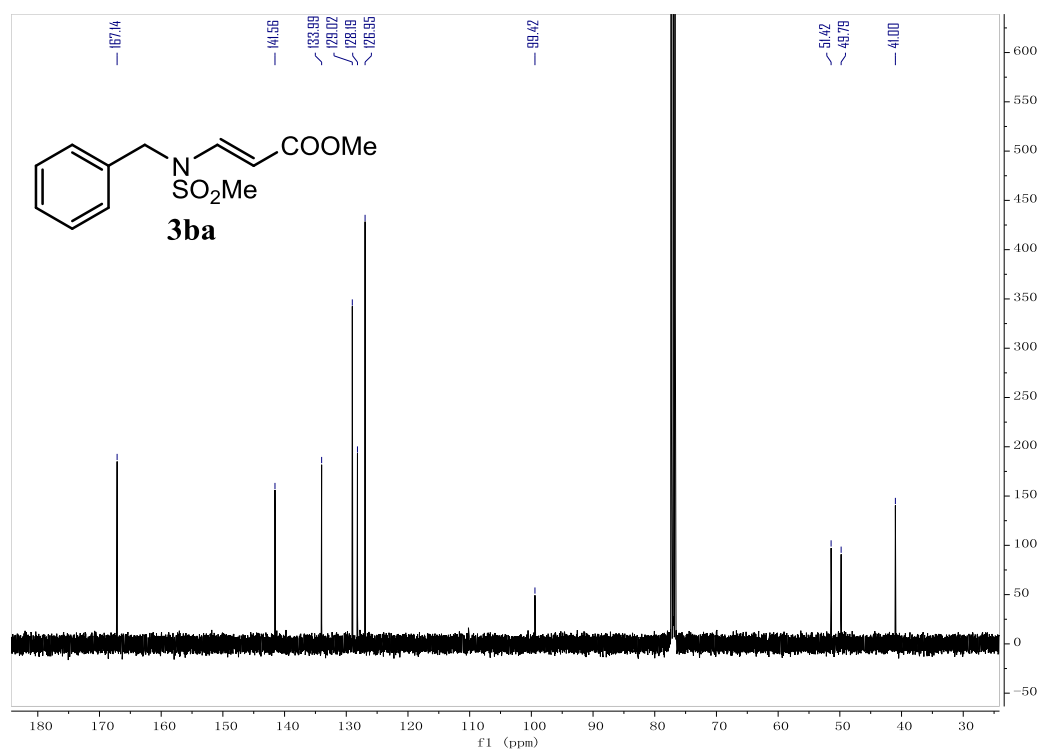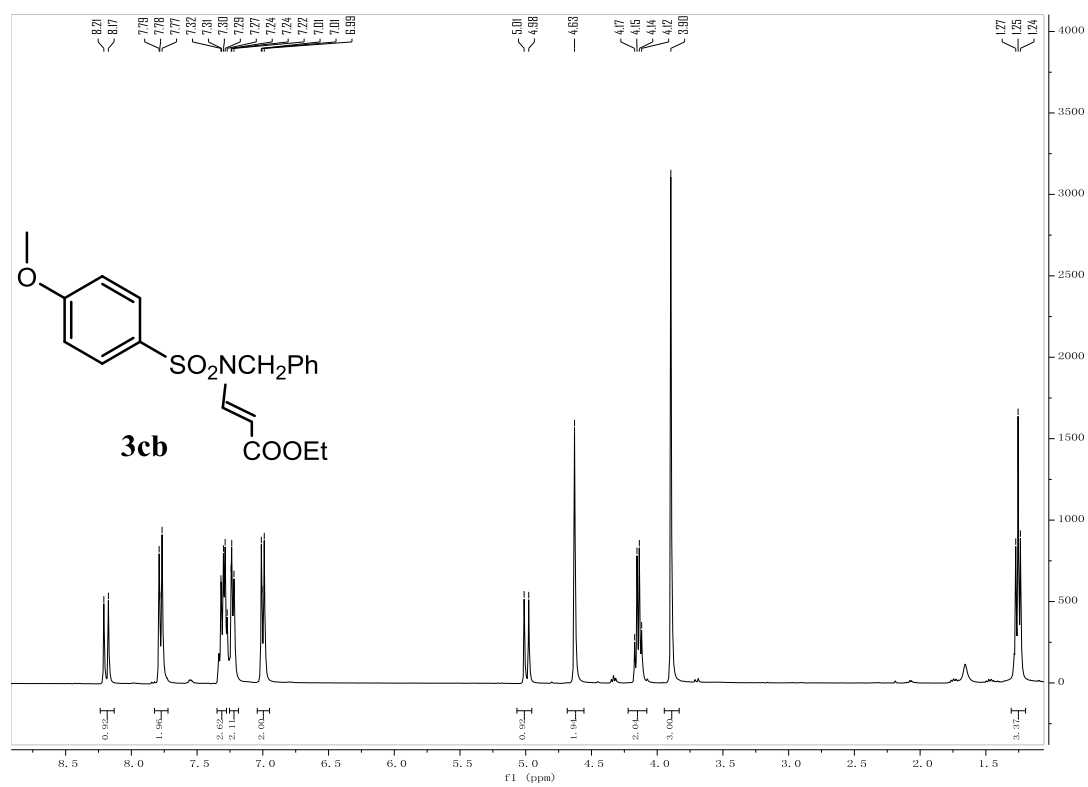

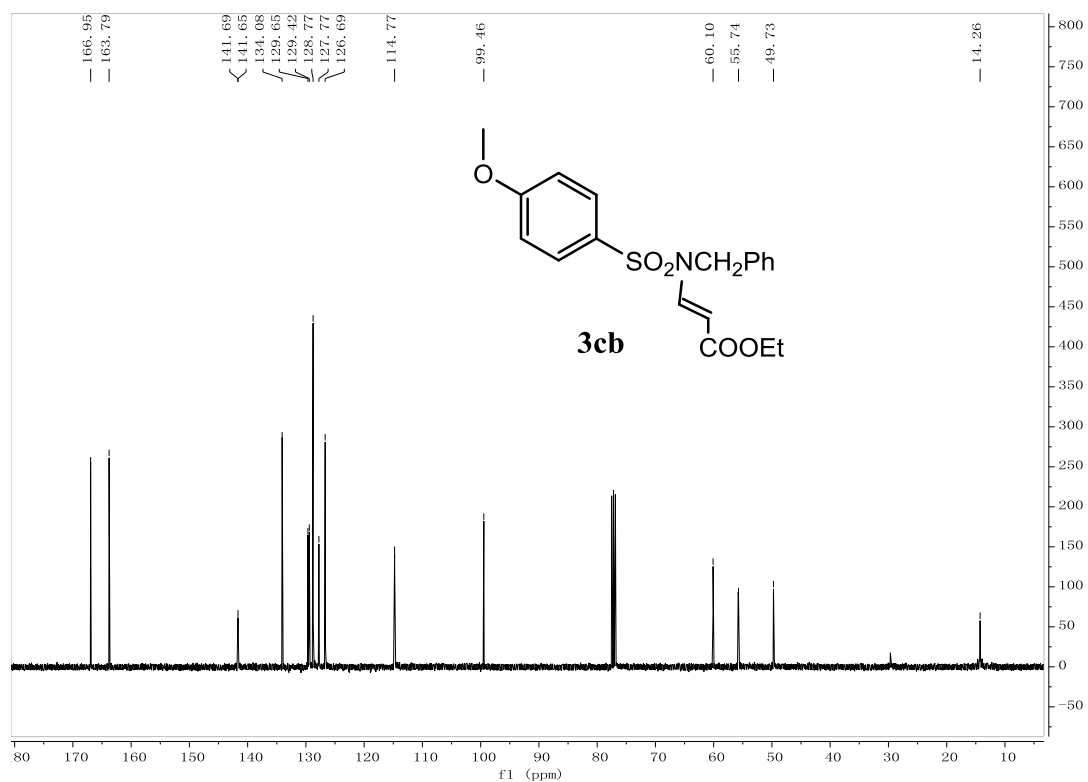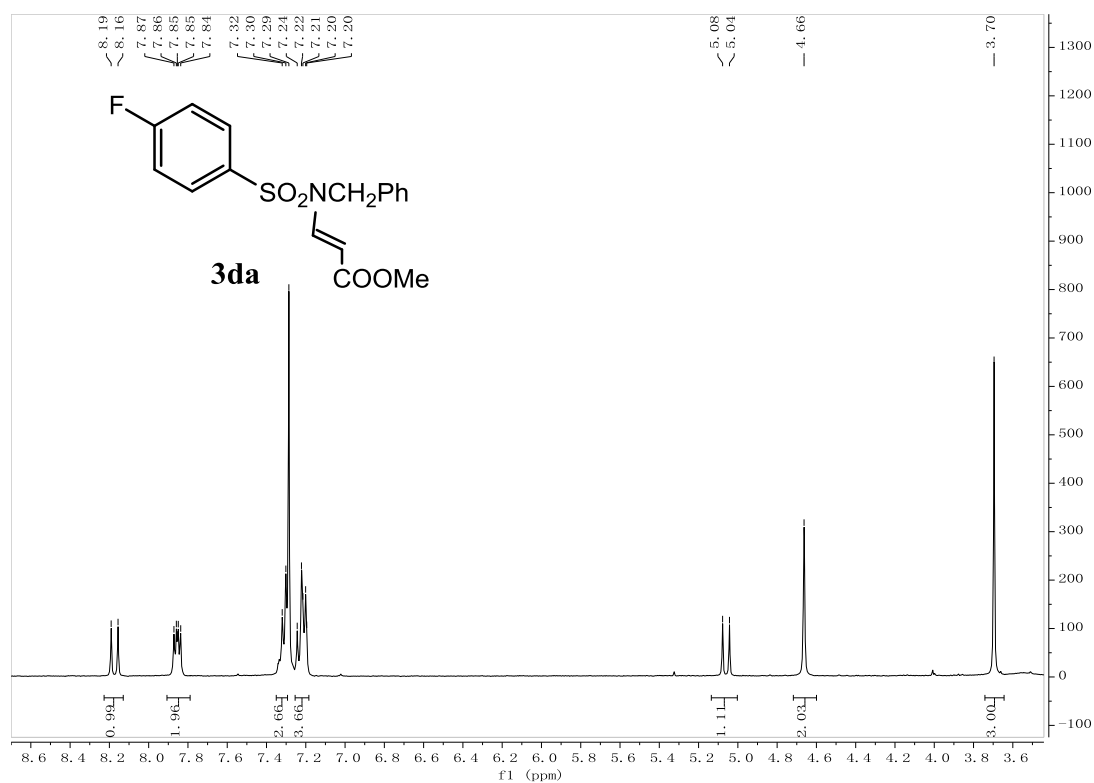

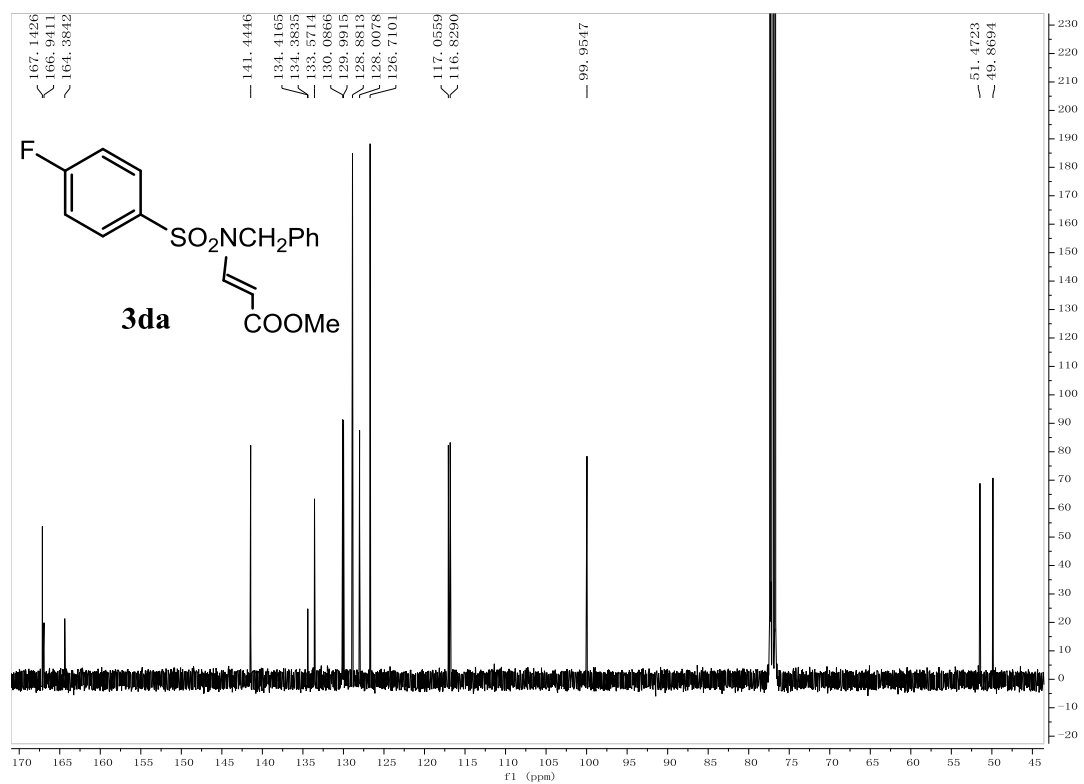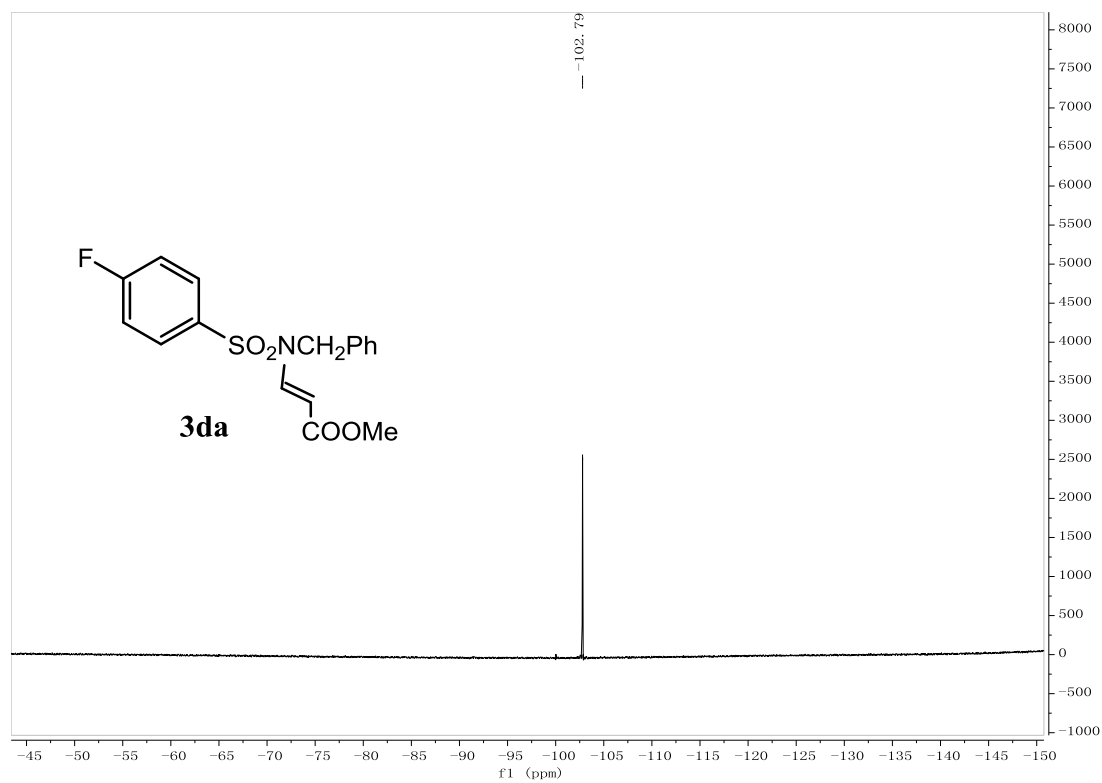

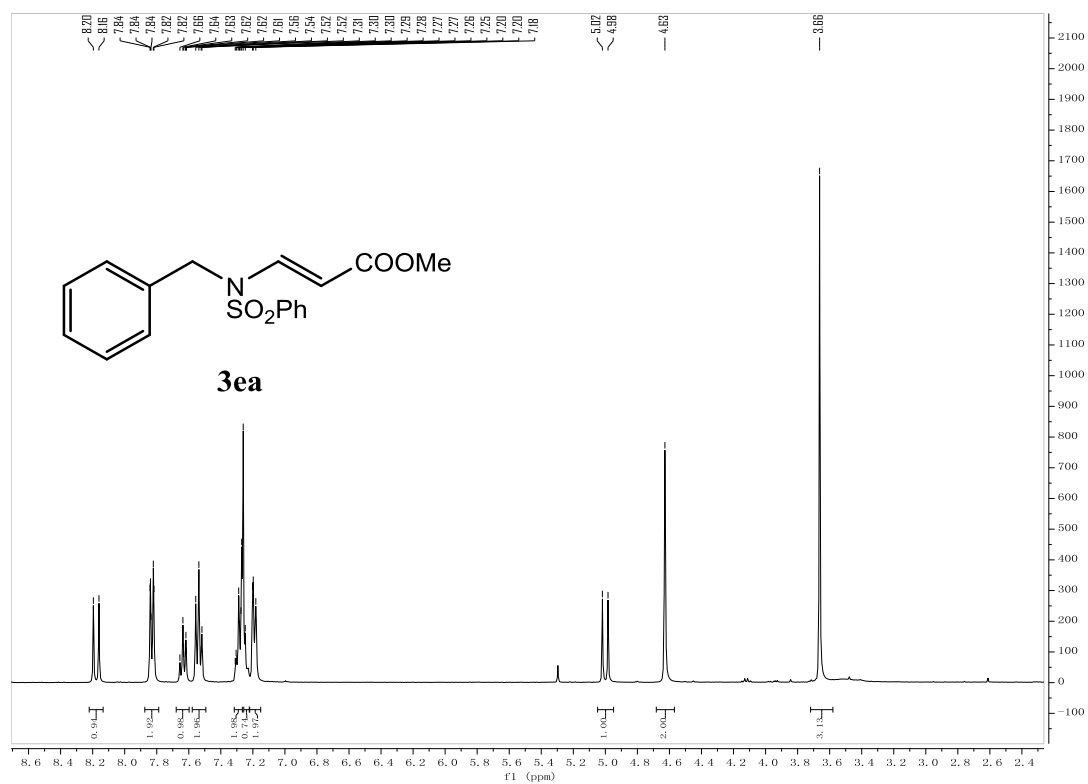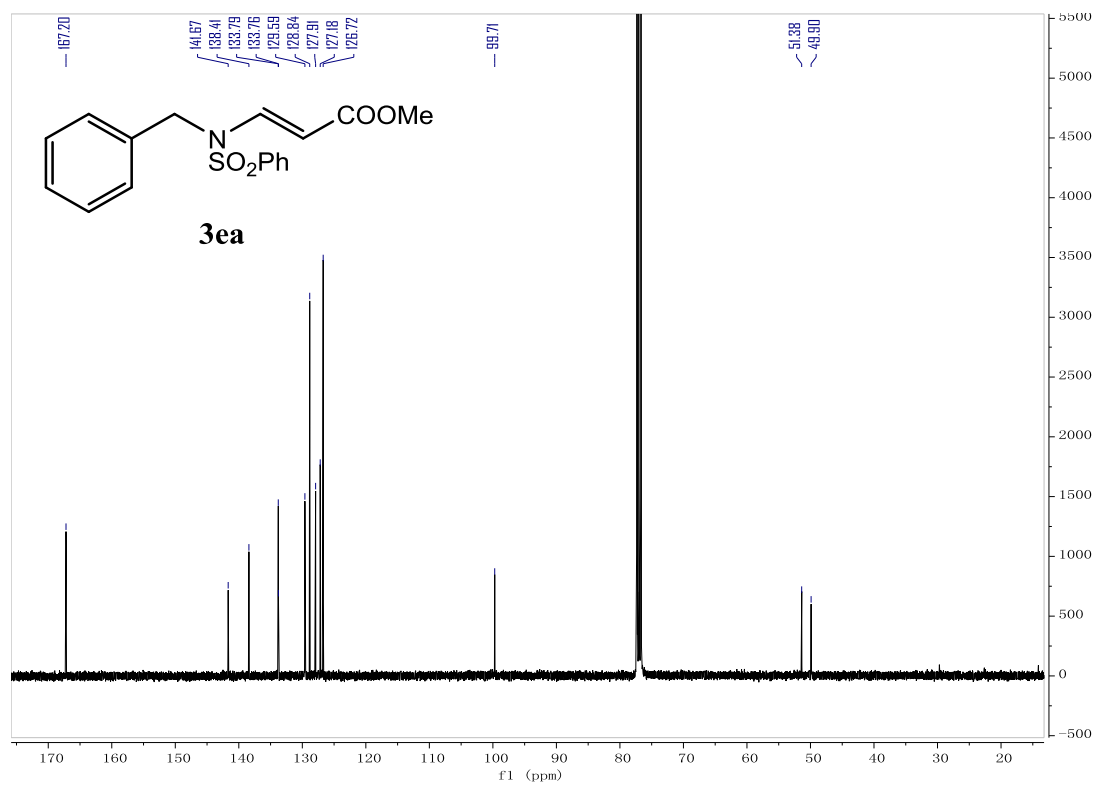





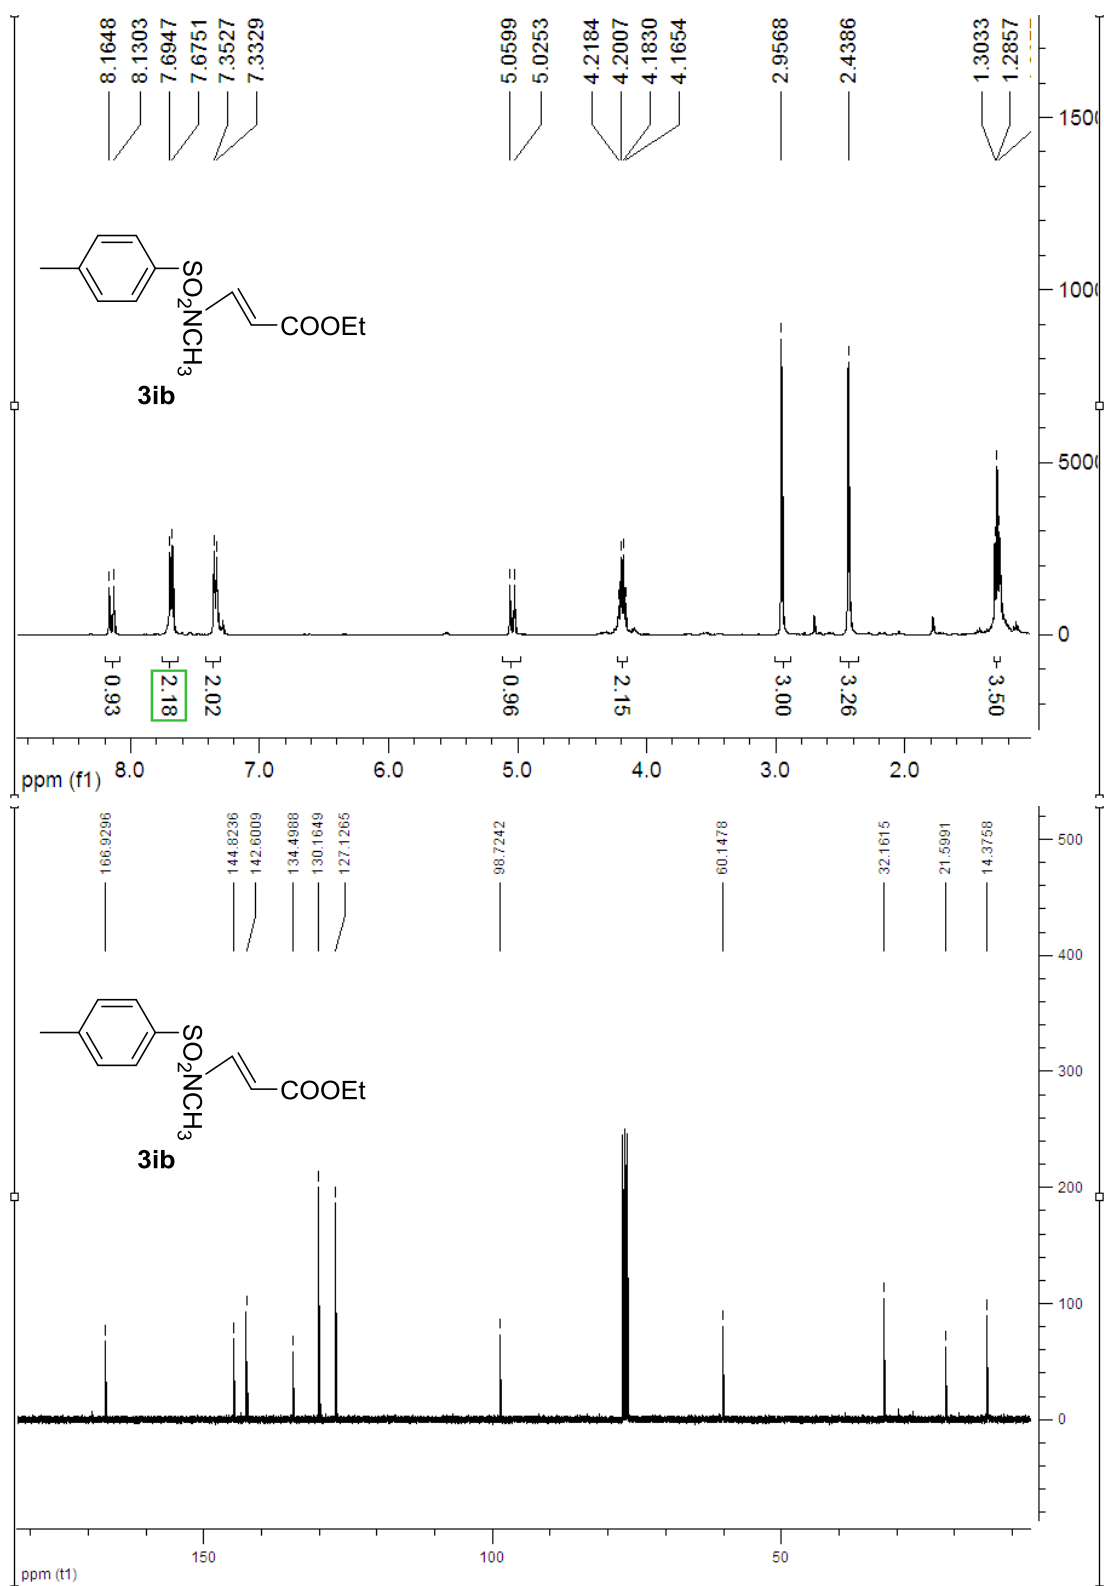

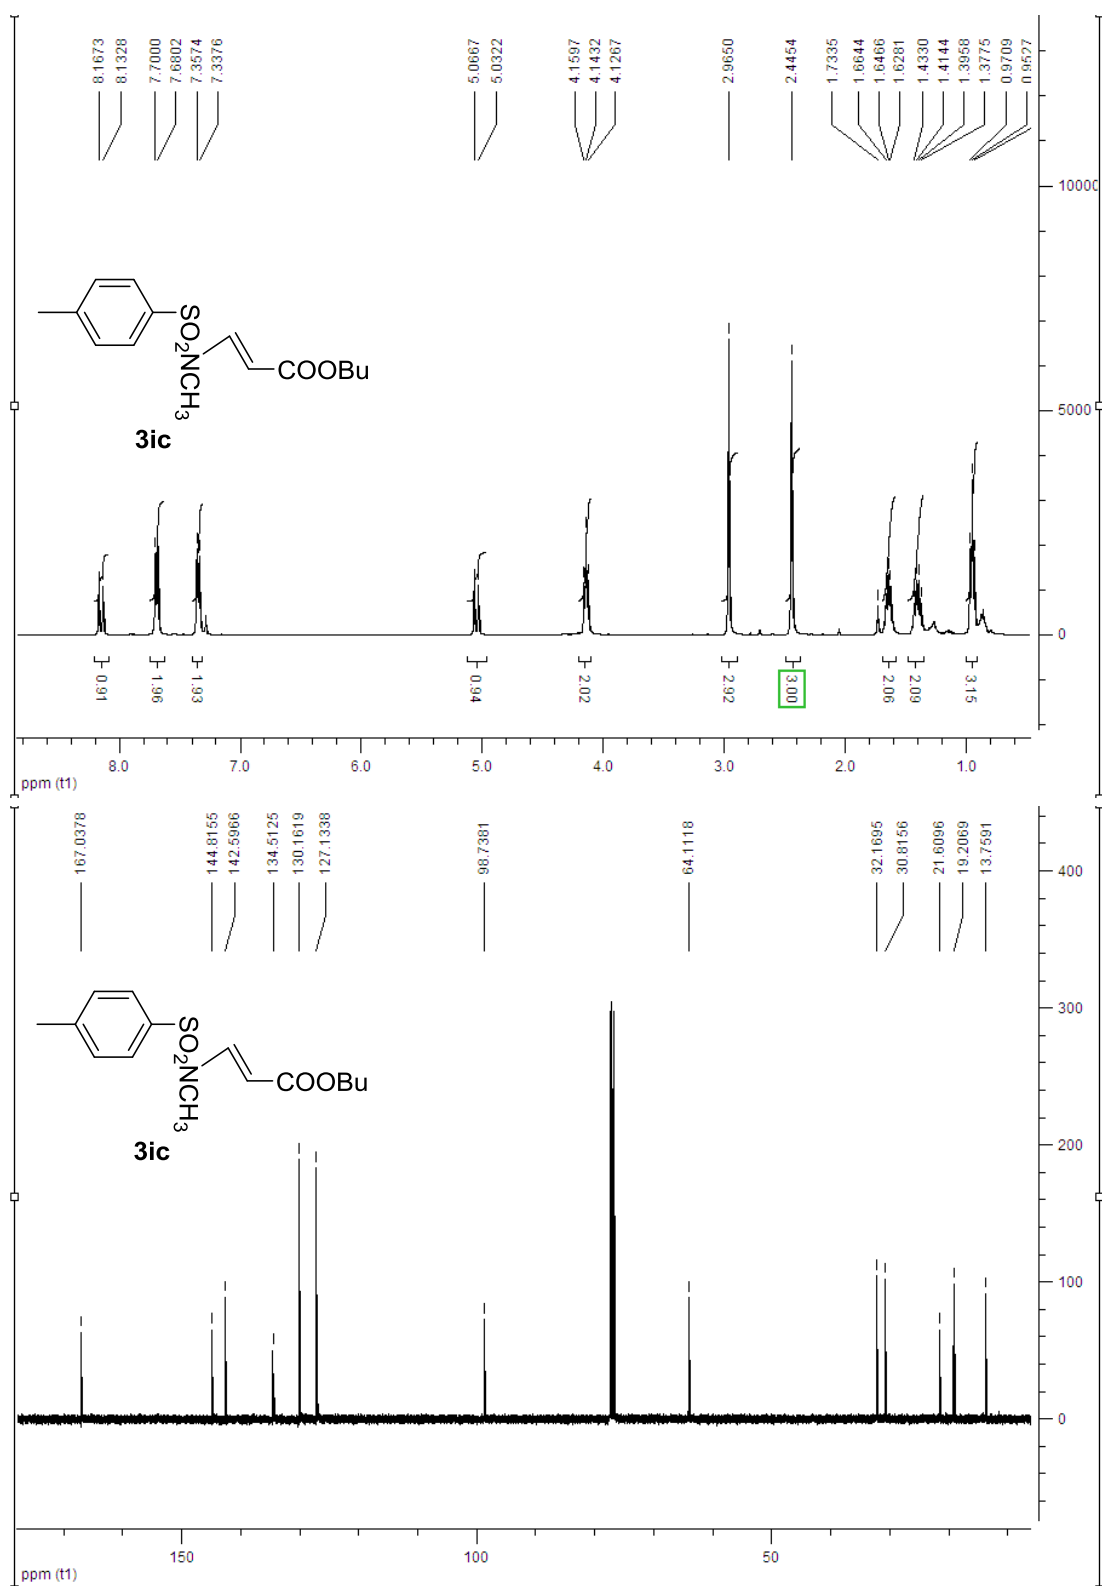

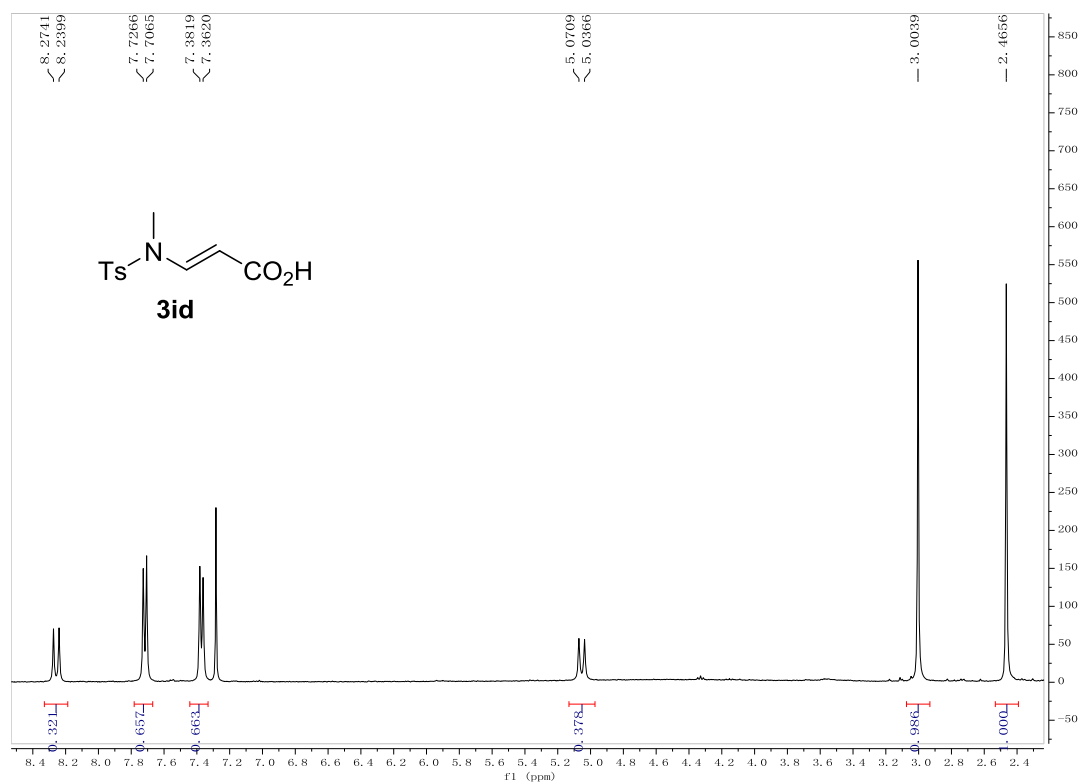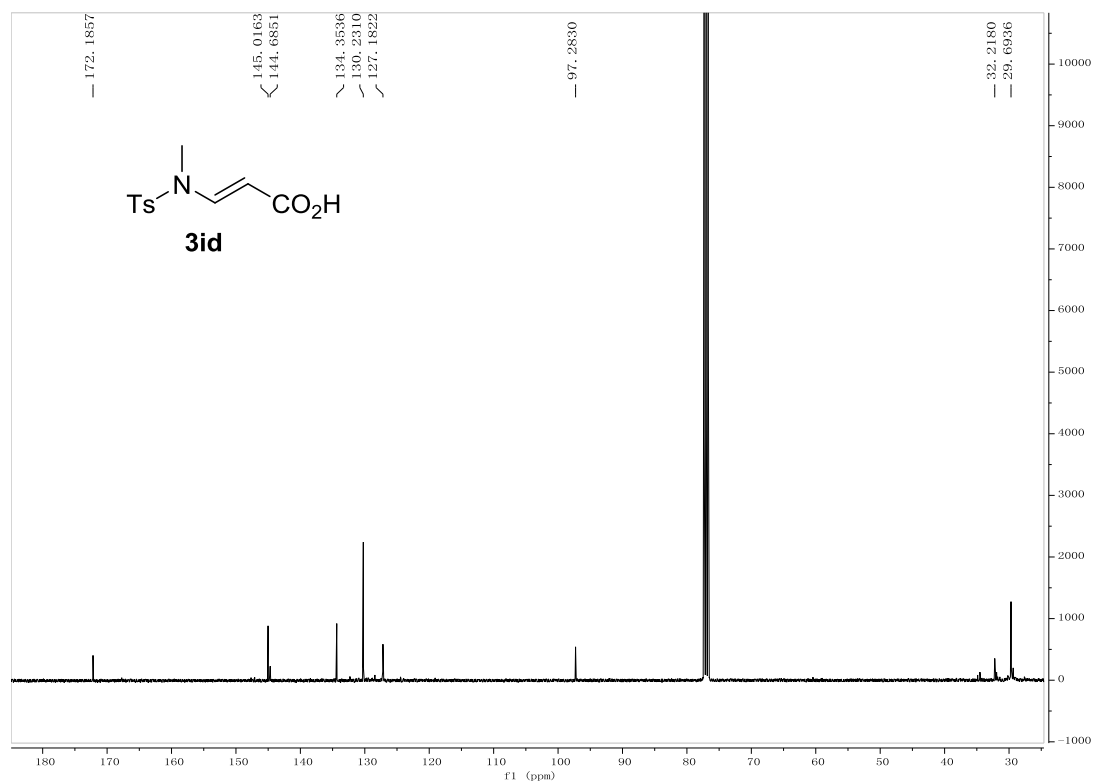

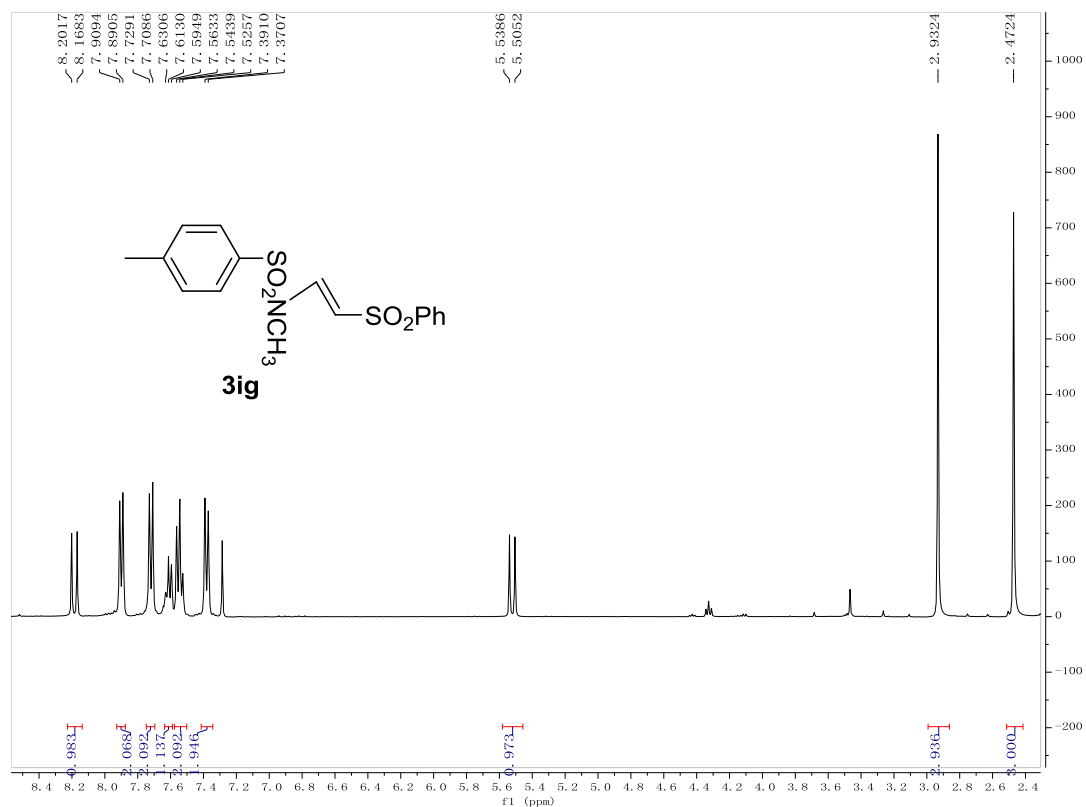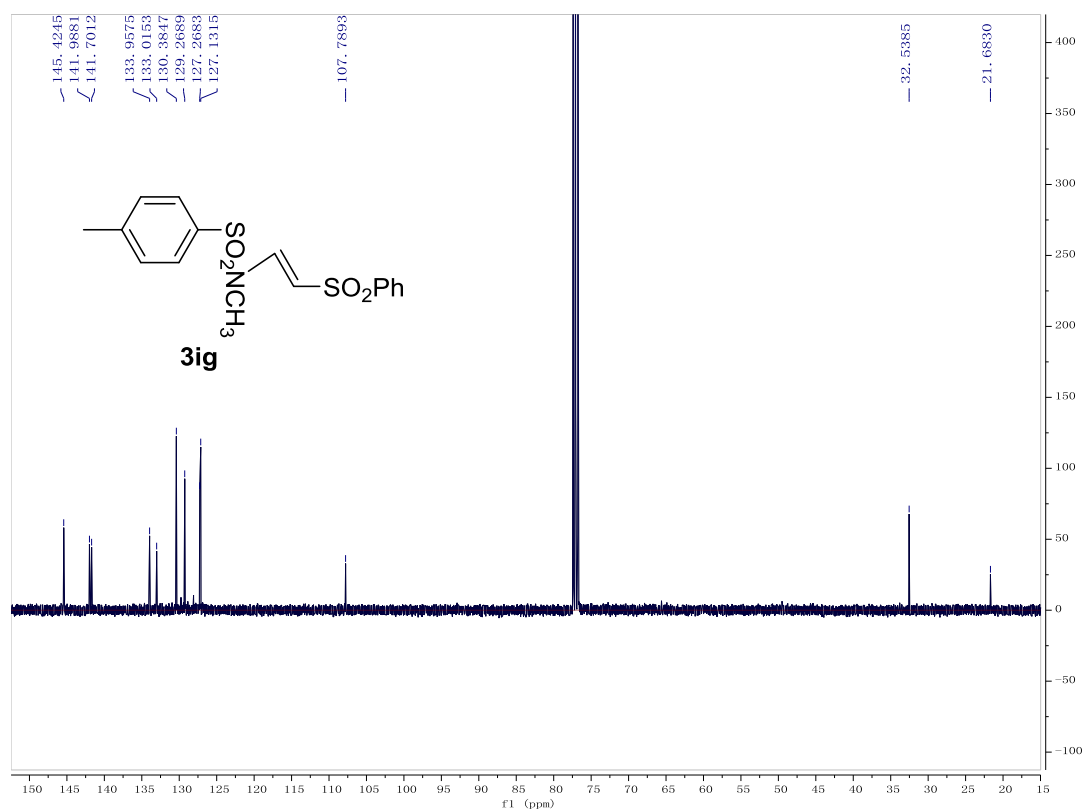

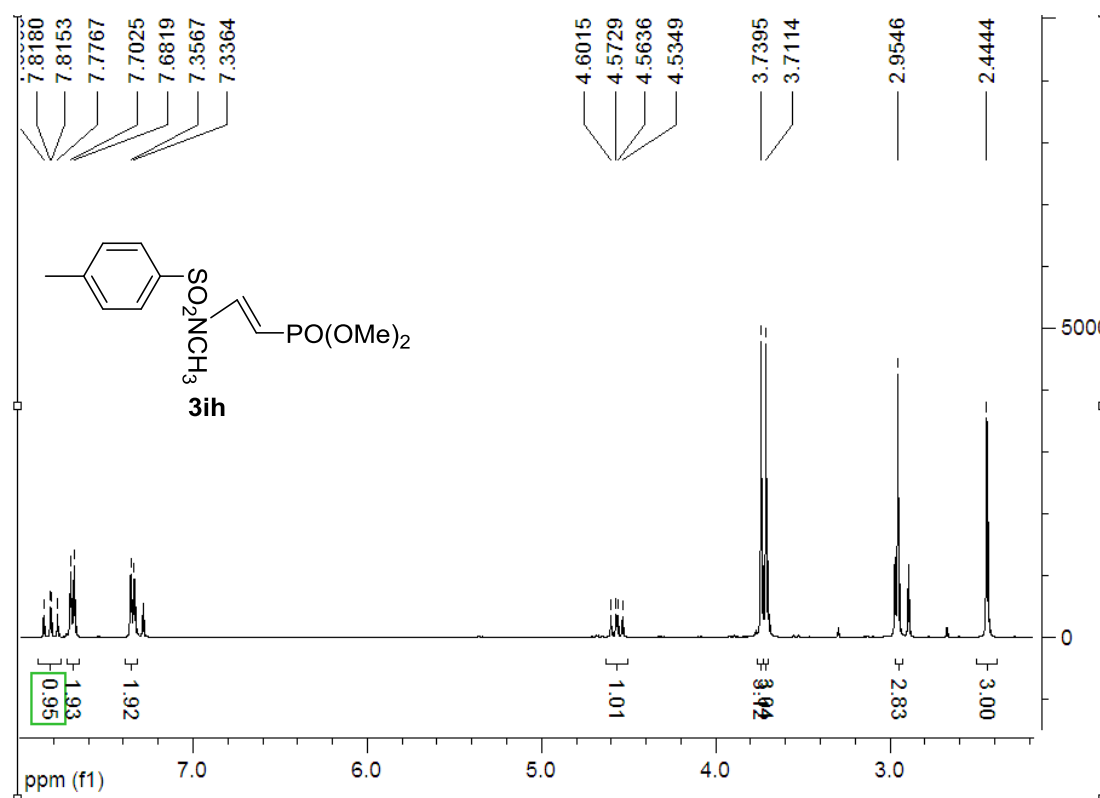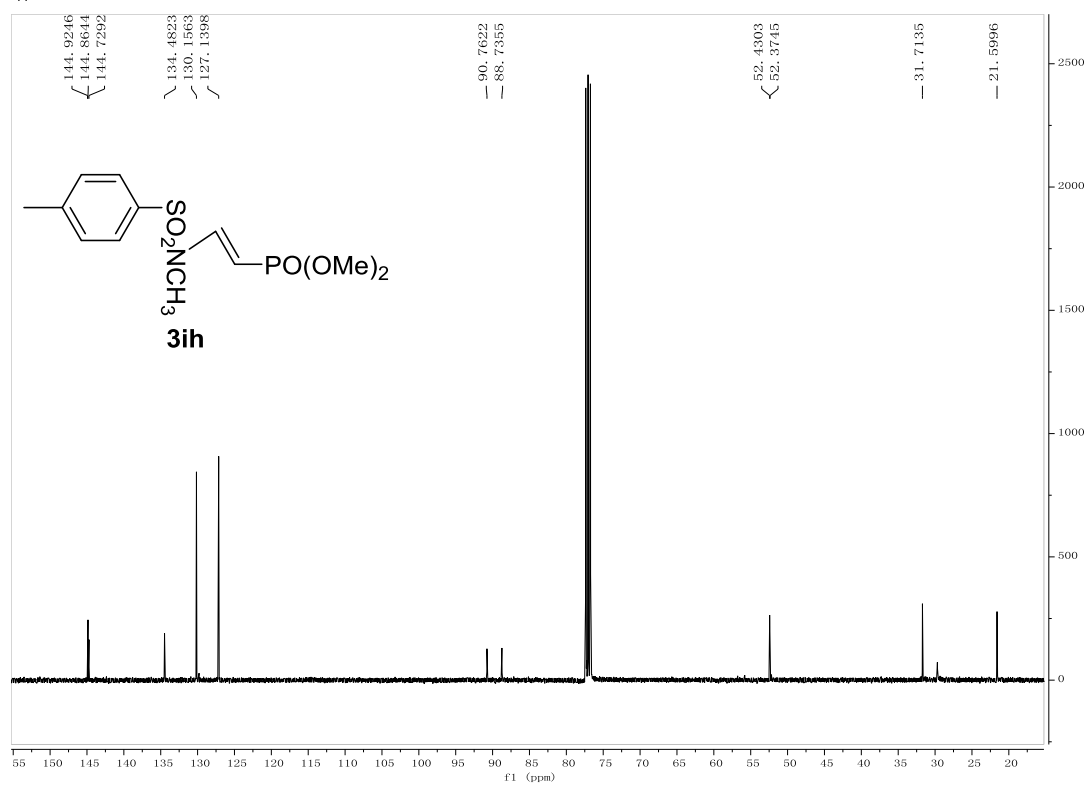

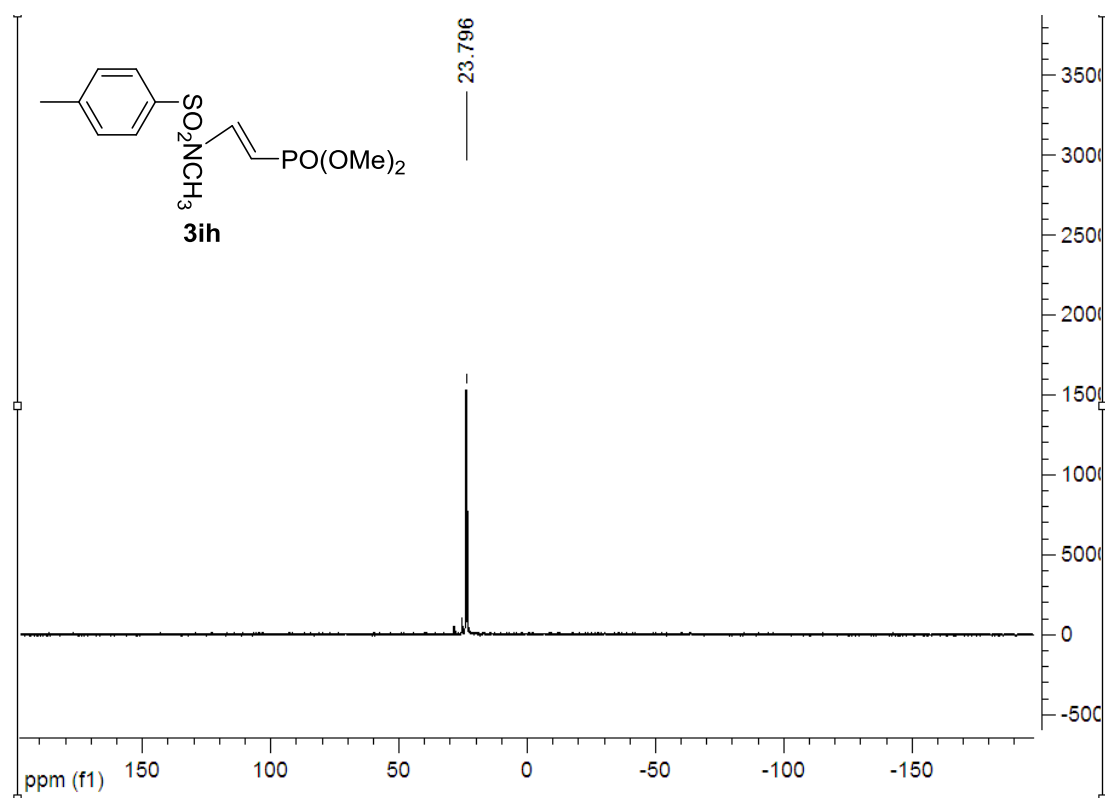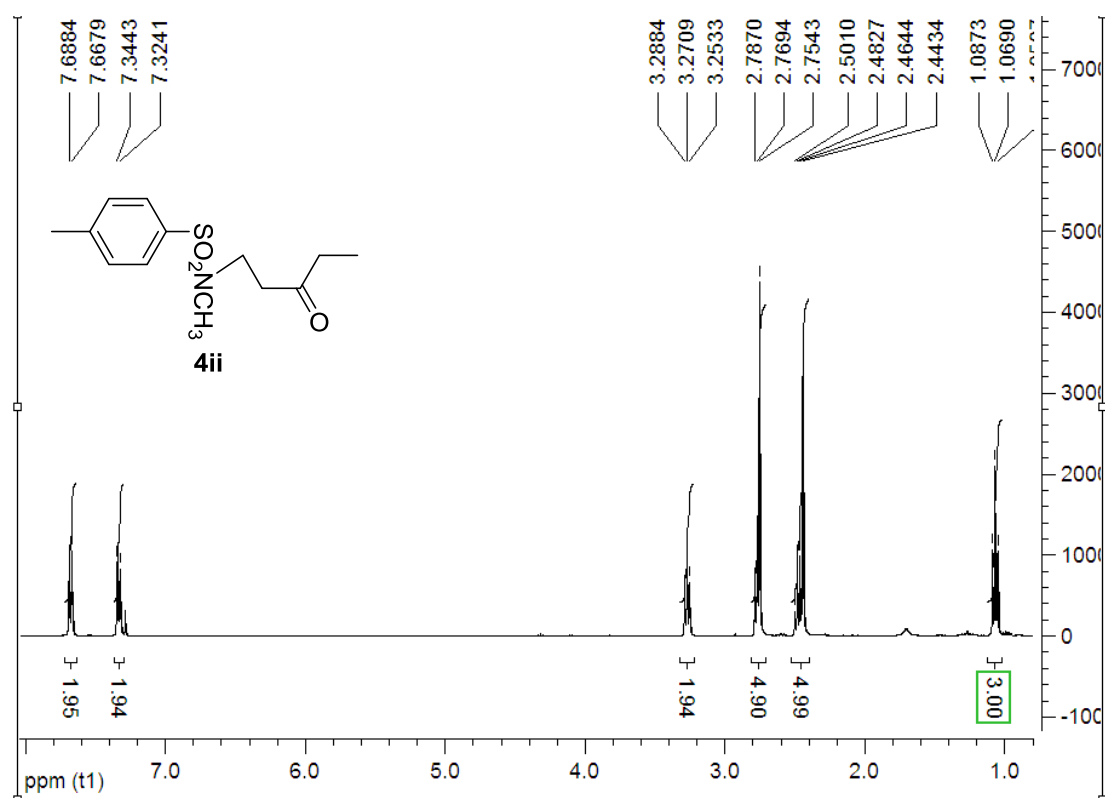

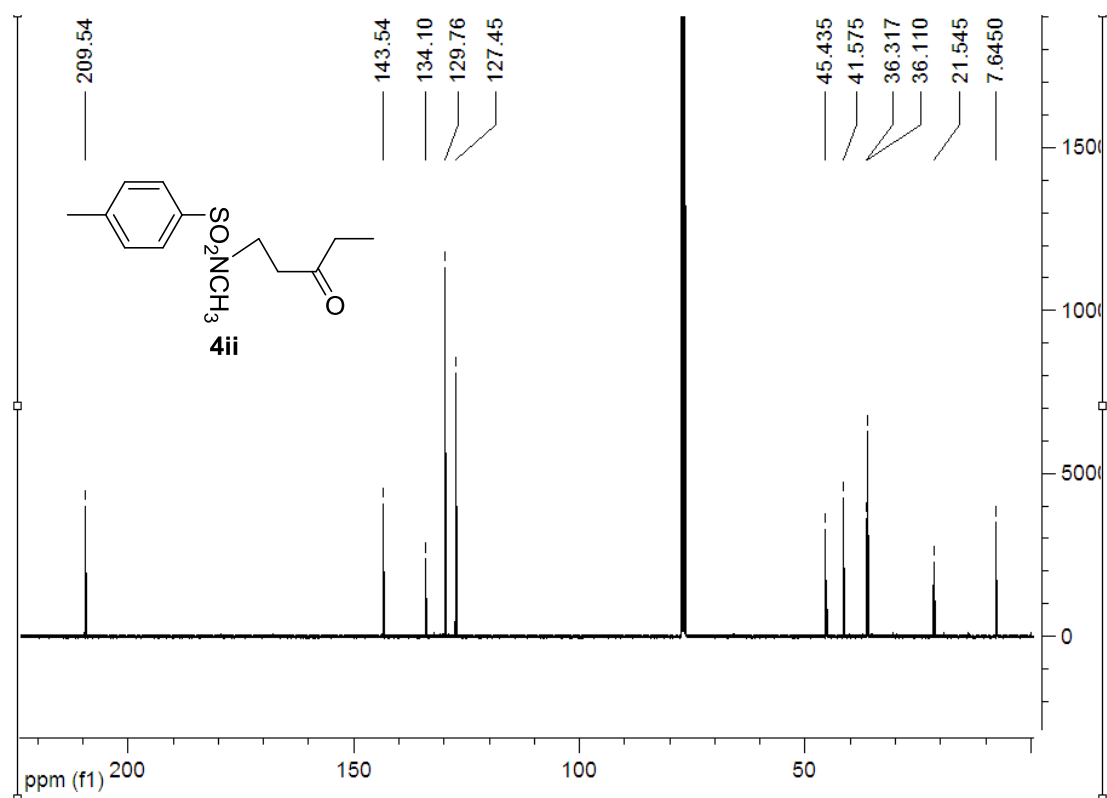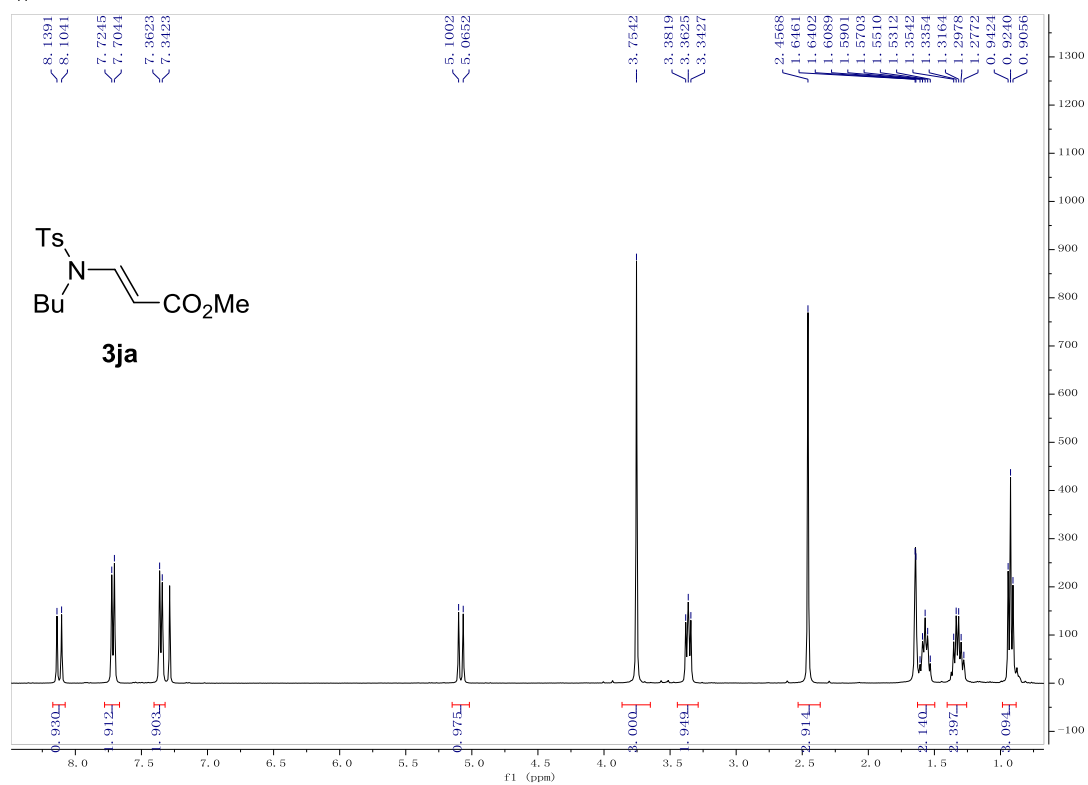

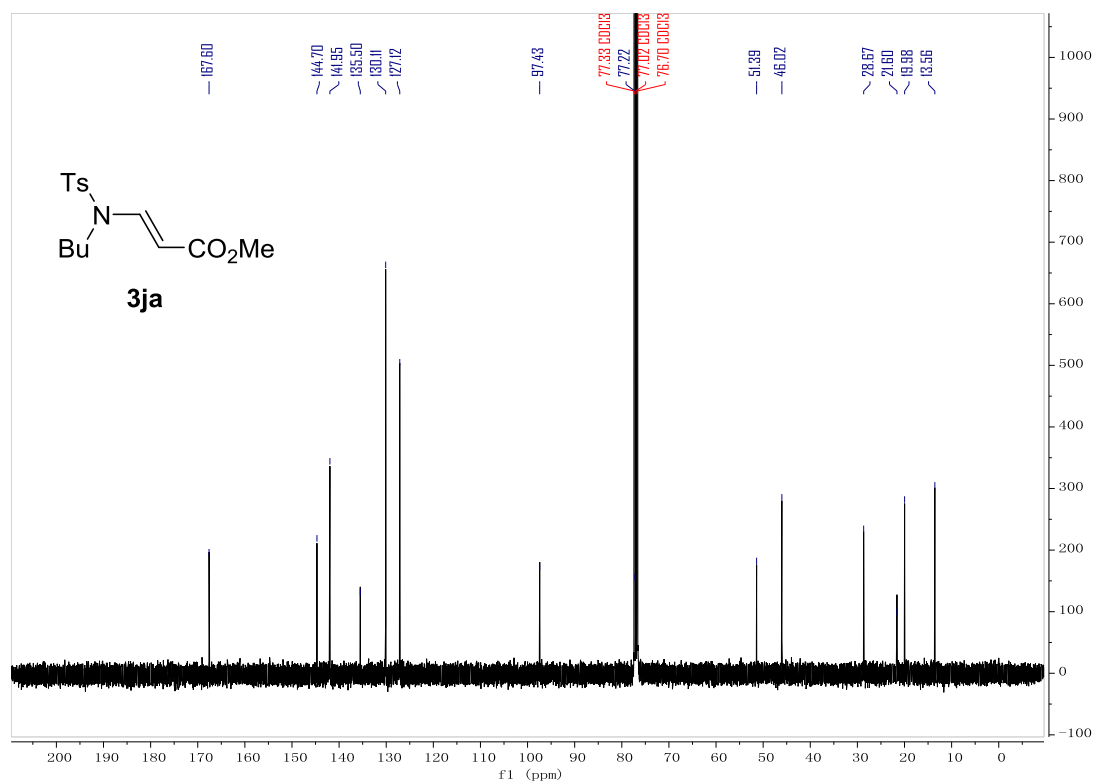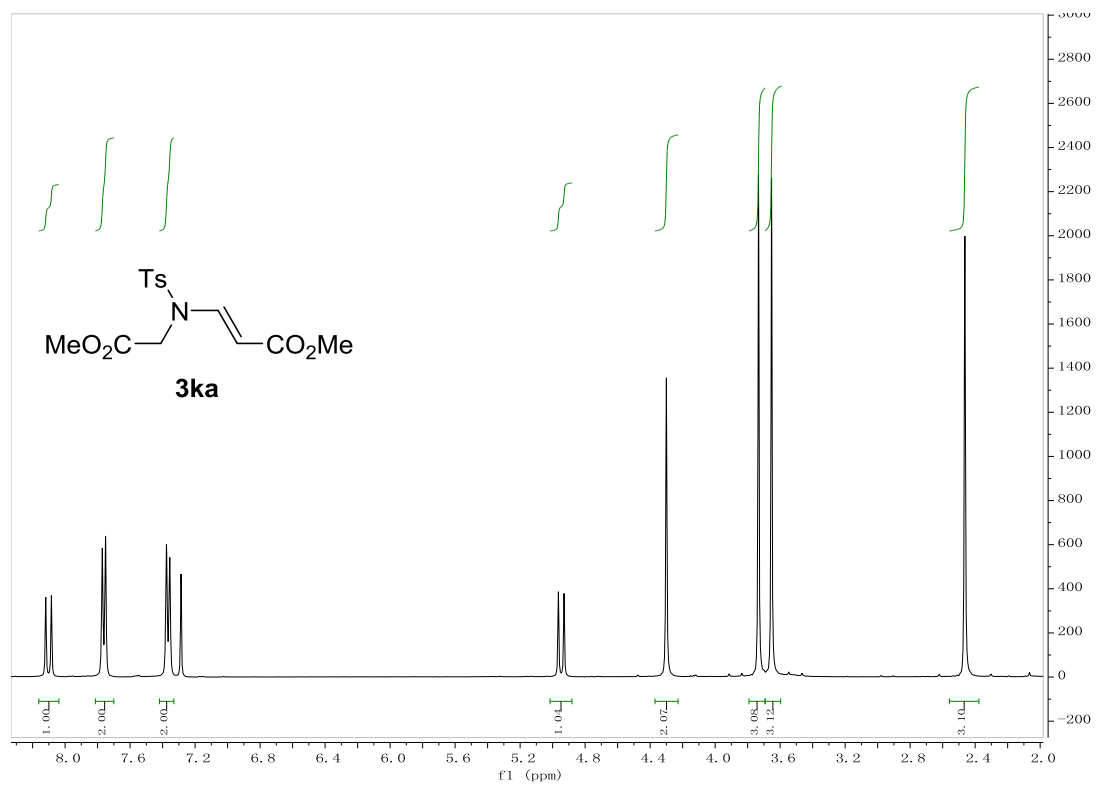



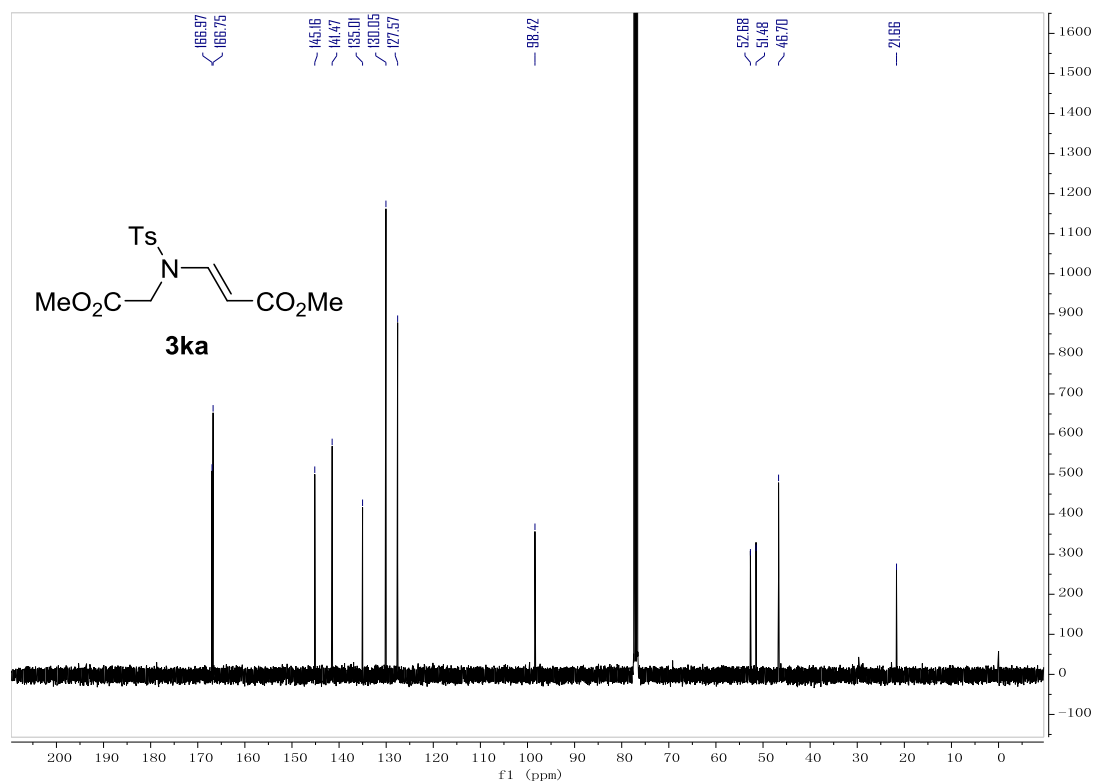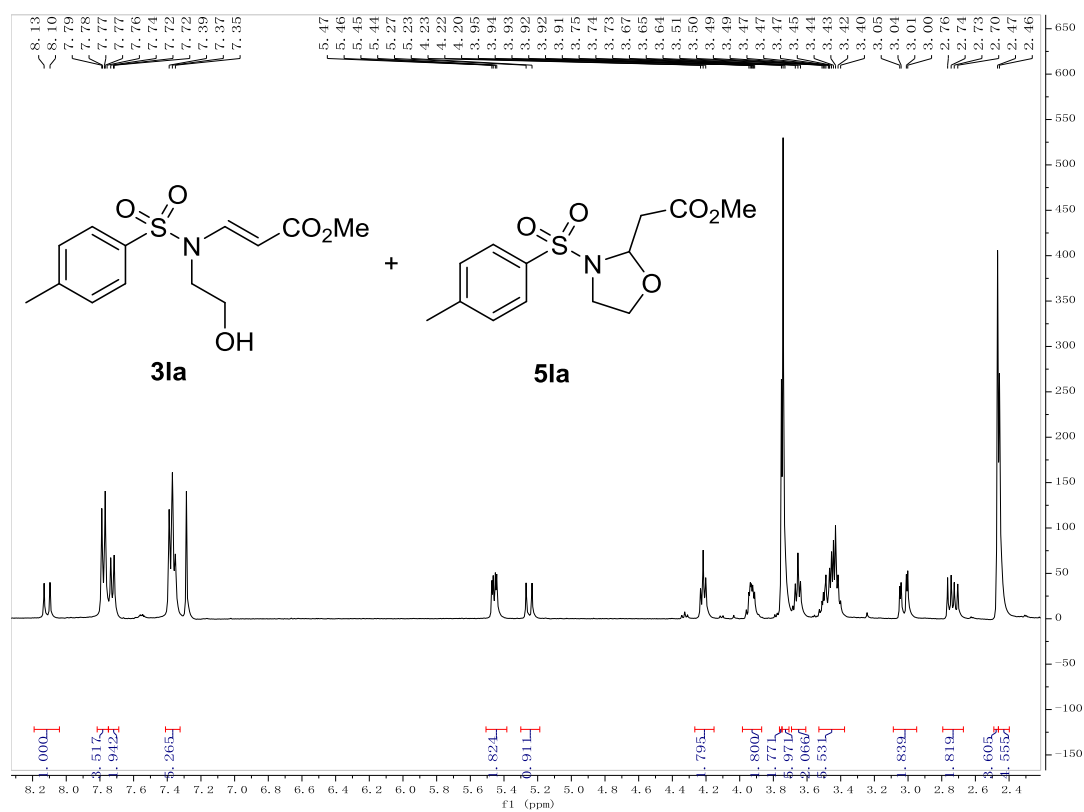

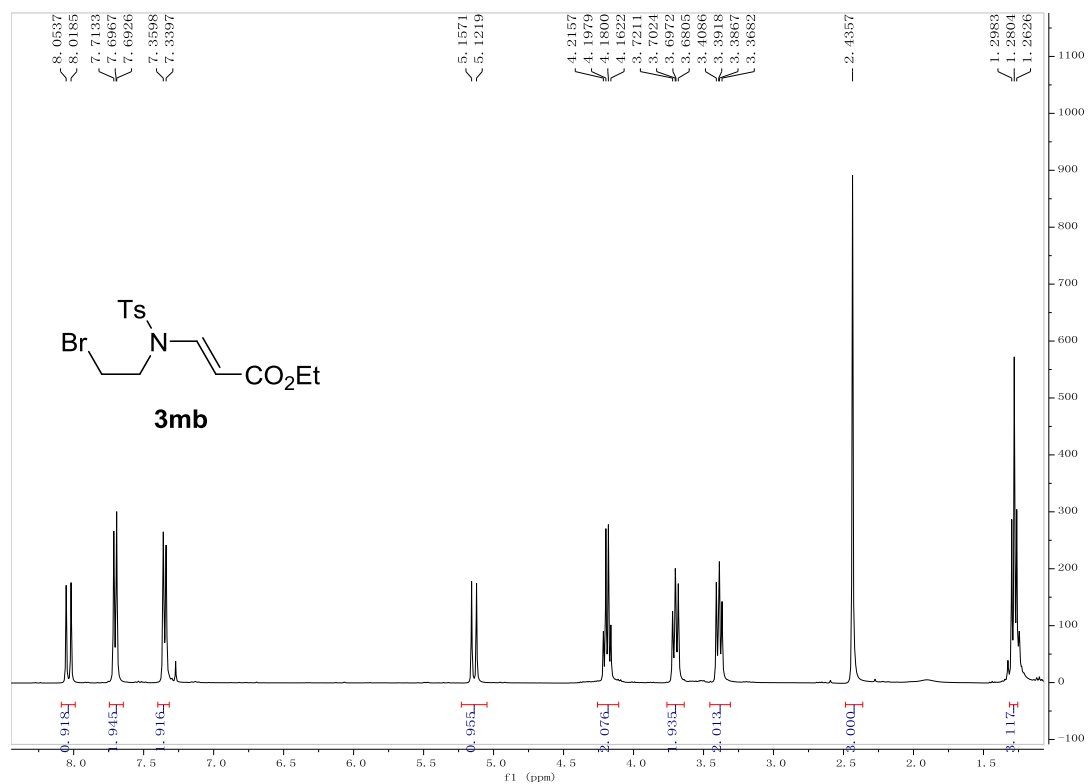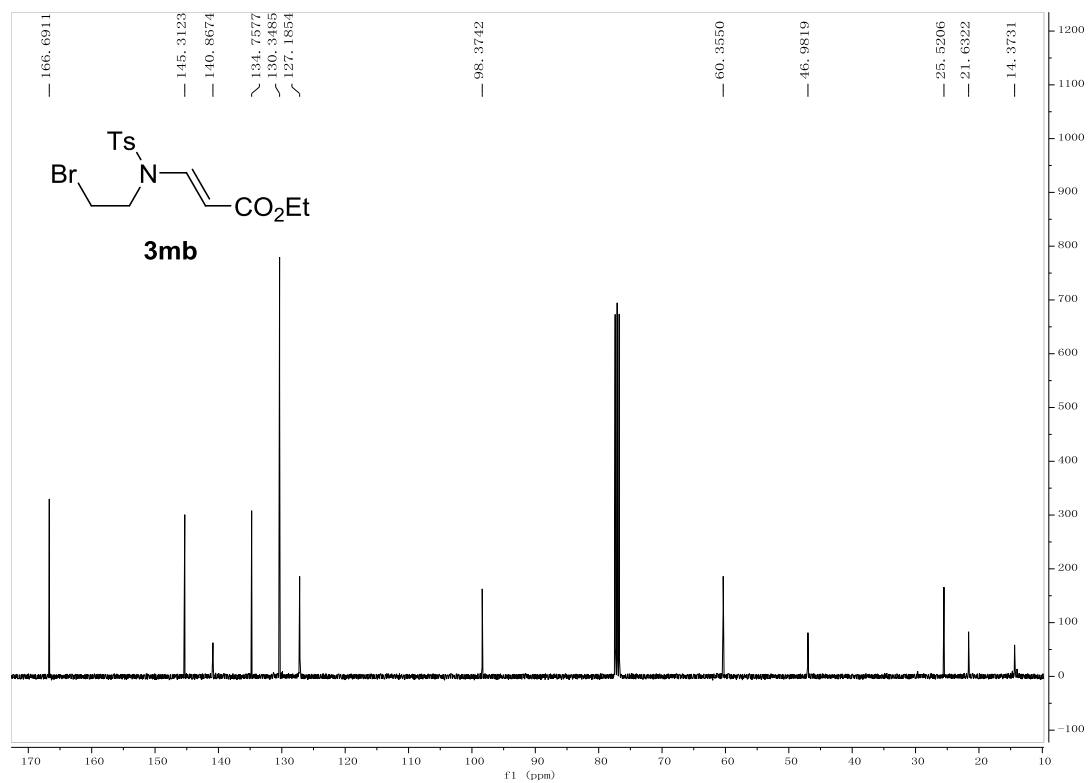

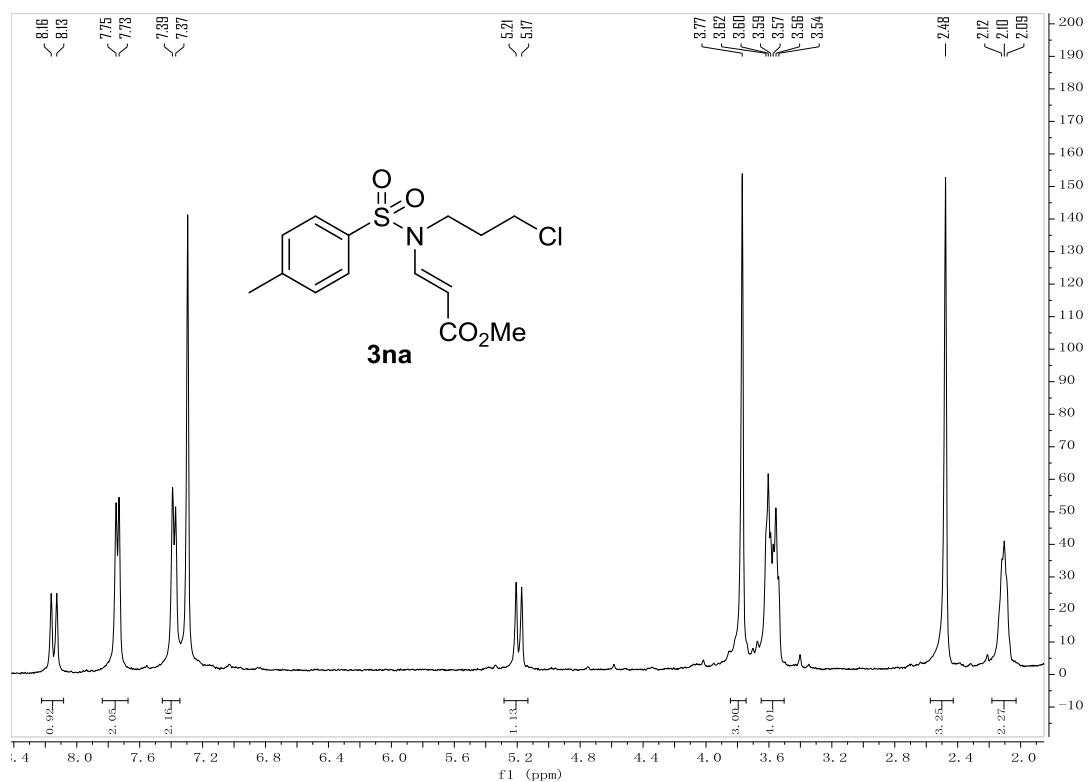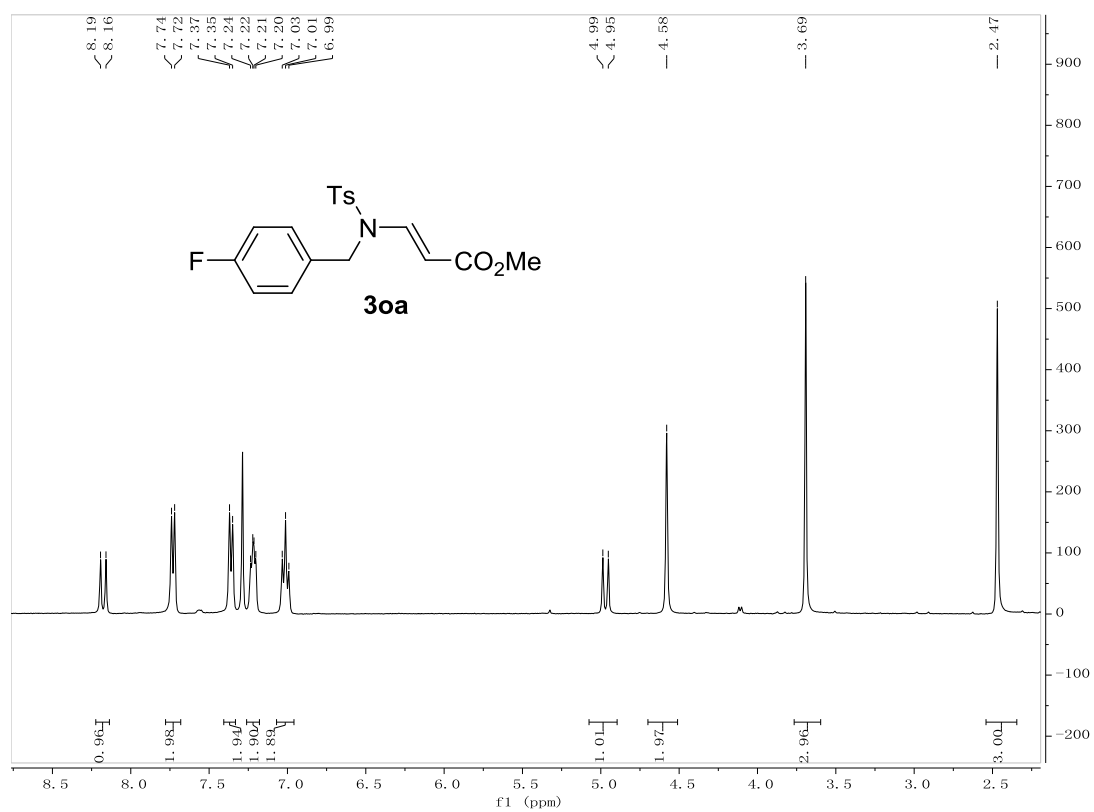

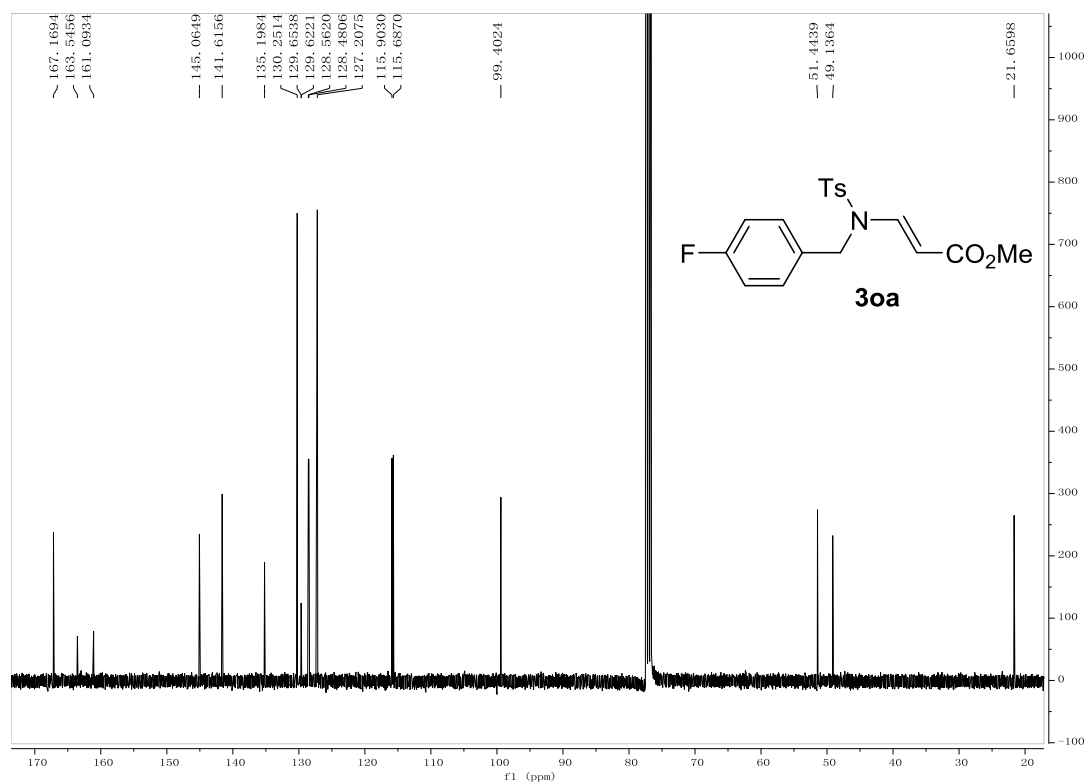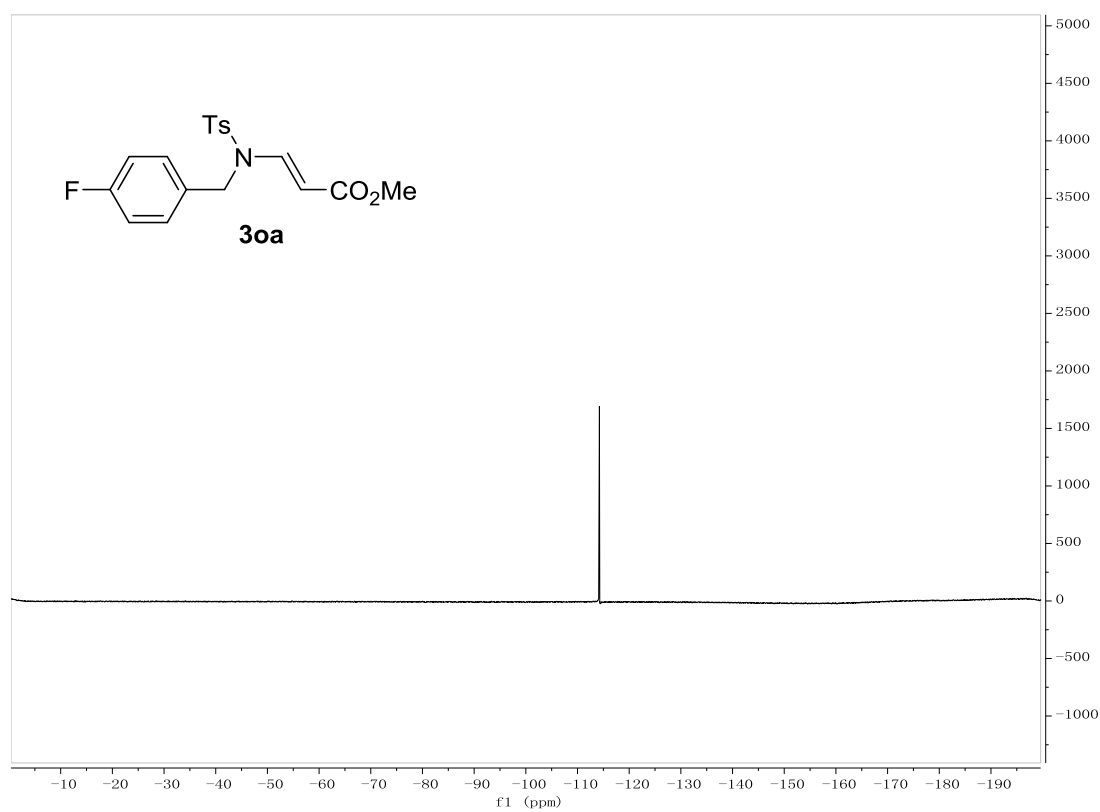

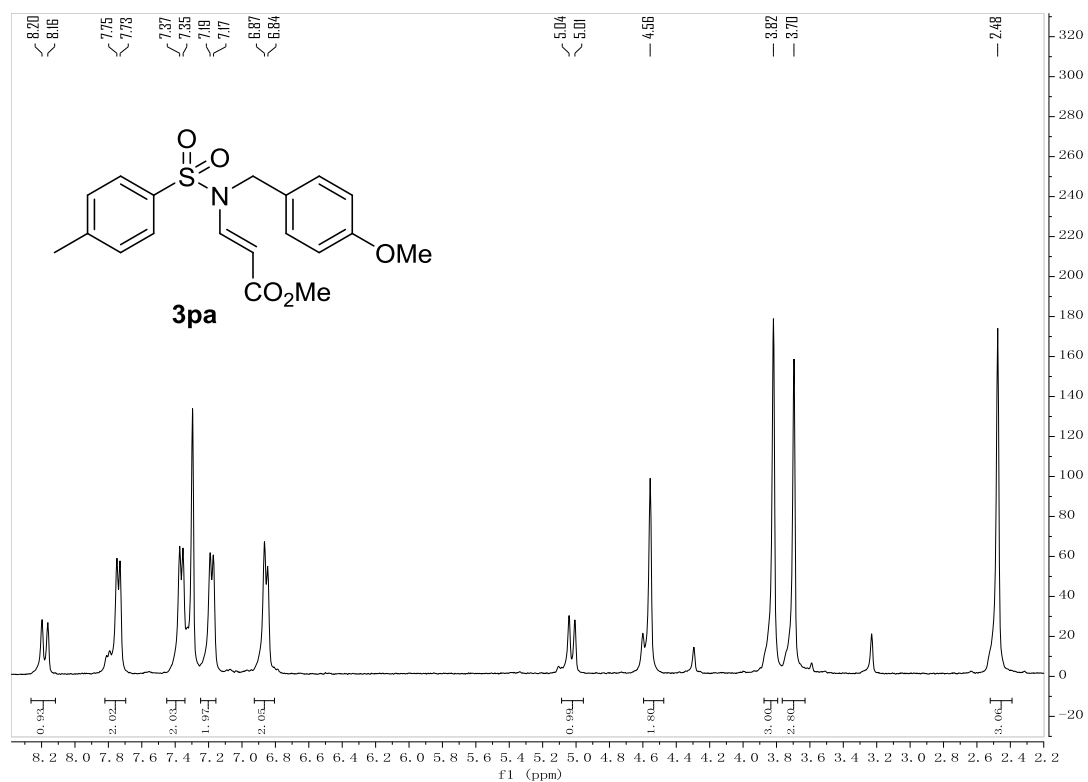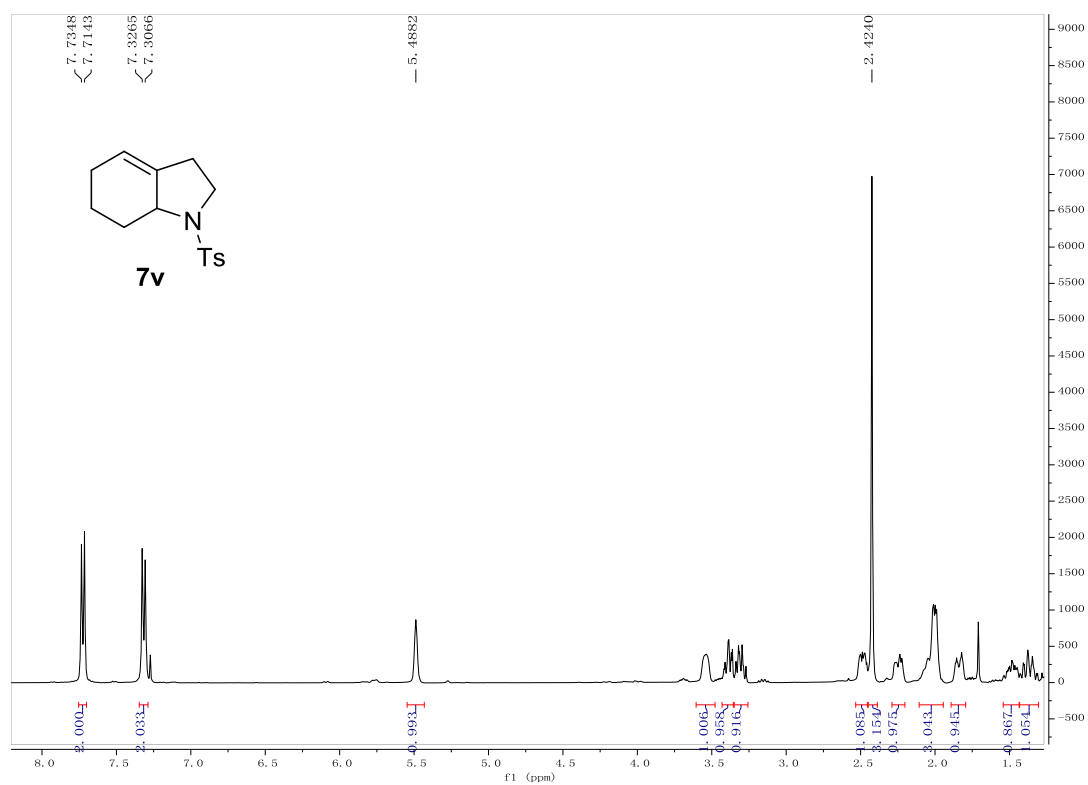

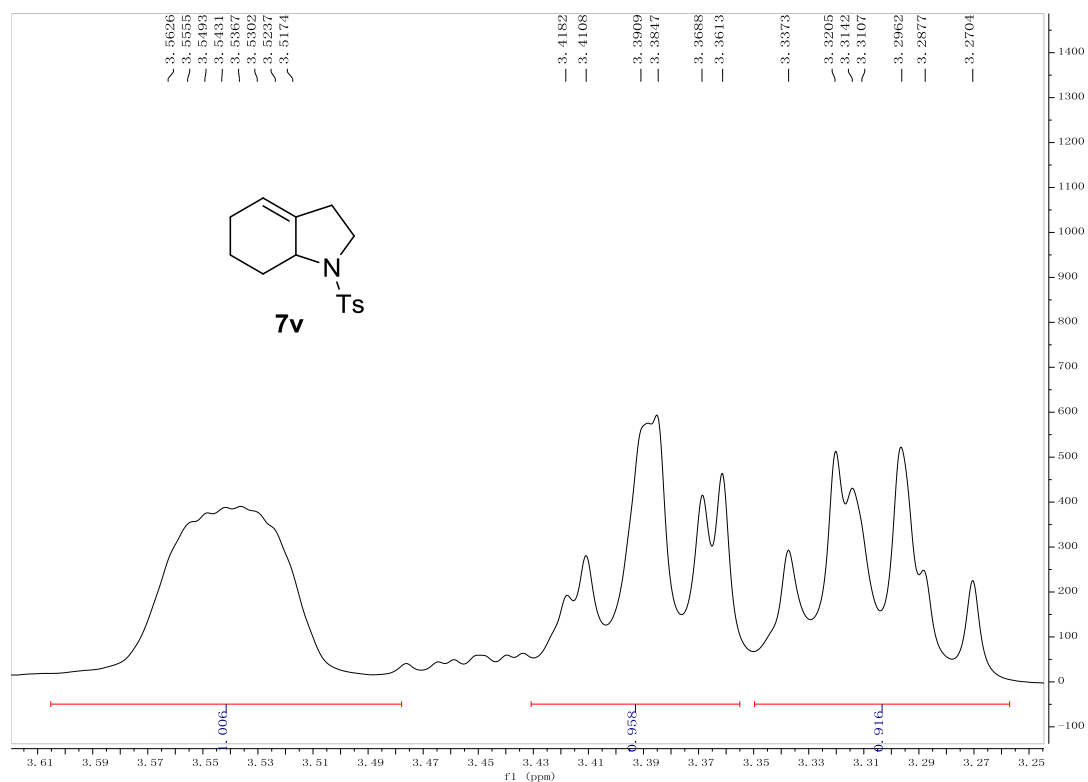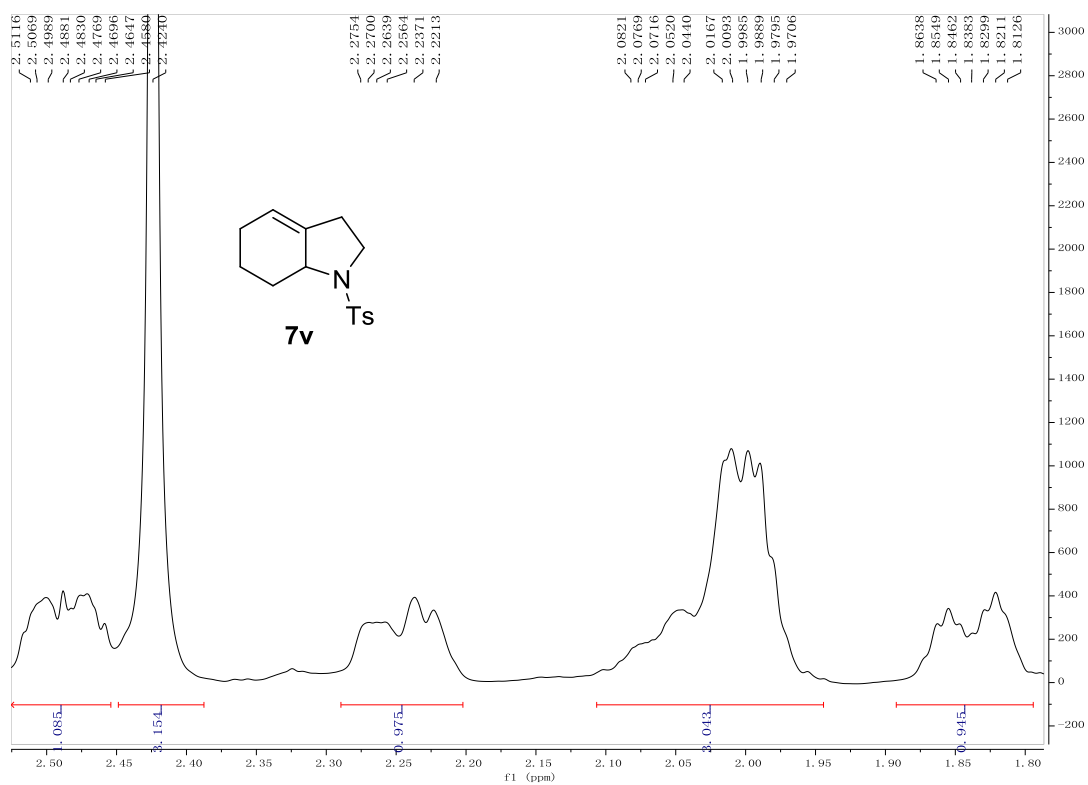

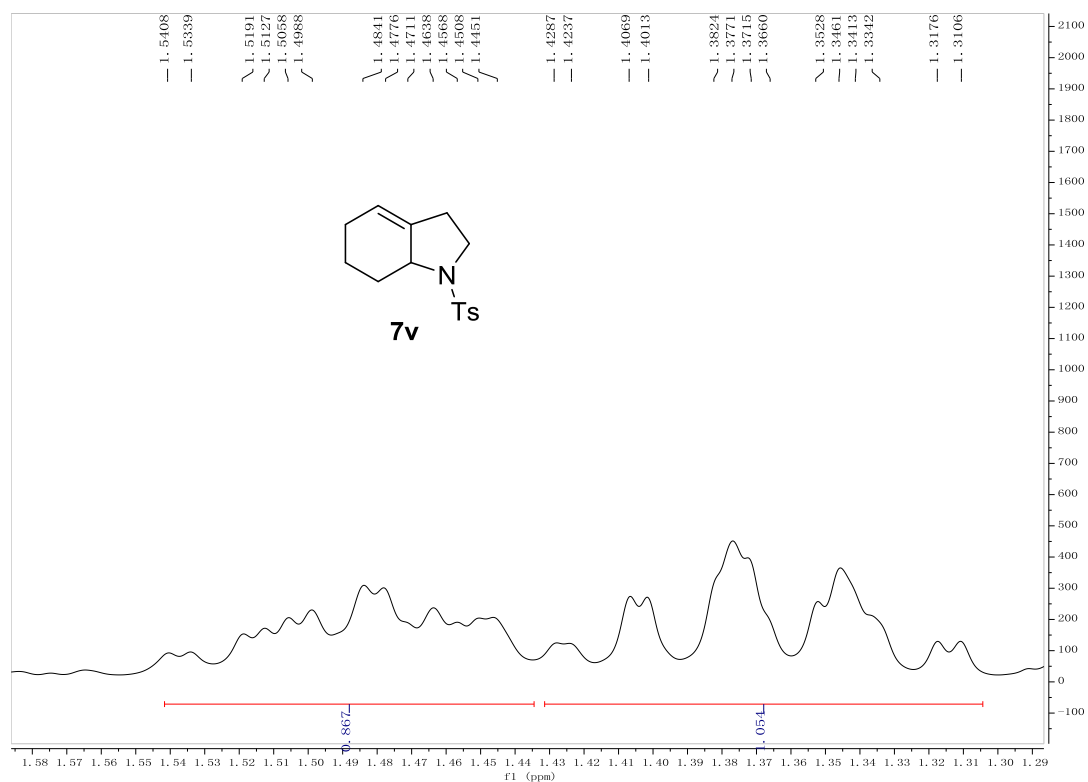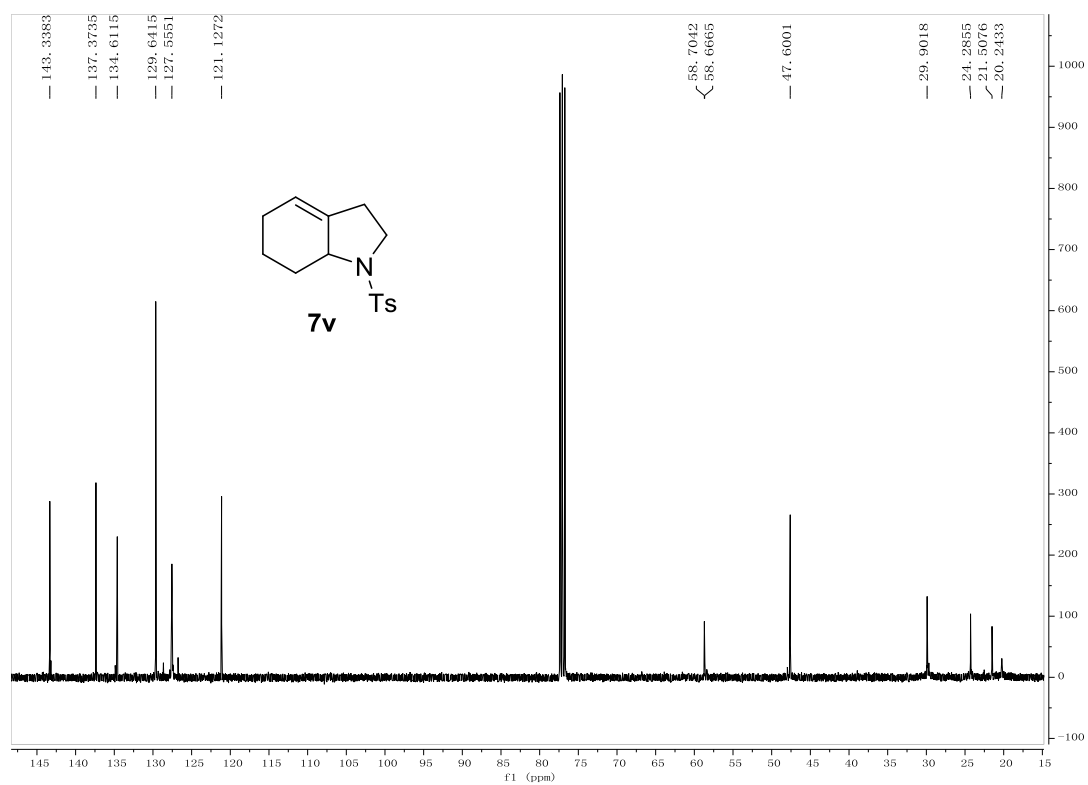

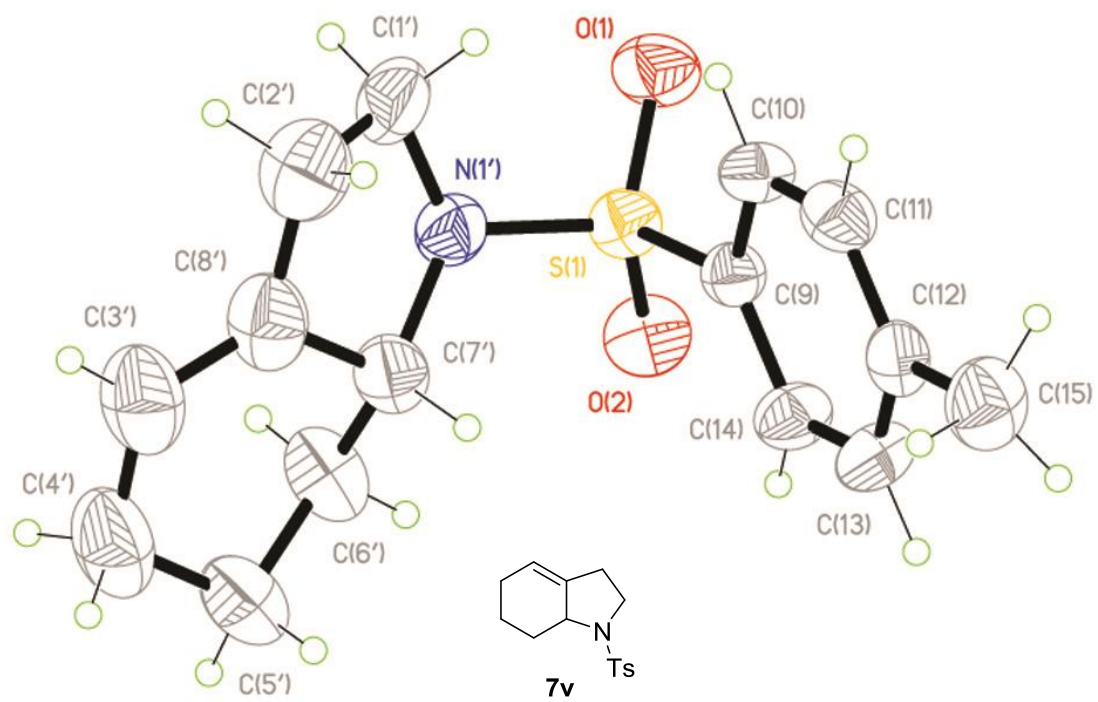

Supplement: Supplementary file 1 [file 3823321]
